# Supplementary material for: Yoga som rehabiliteringsmetod vid fysisk aktivitet på recept mot utmattningssyndrom
Source: Royal Society of Chemistry journal article supplement (doi:10.1039/c6ob00868b), 2012-01-01
Supplement: c6ob00868b1.pdf [file c6ob00868b1.pdf]

## Electronic Supplementary Information

### Table of Contents:

|                         |                                                                                    |         |
|-------------------------|------------------------------------------------------------------------------------|---------|
| Compound 1a             | <sup>1</sup> H, <sup>13</sup> C, DEPT, <sup>1</sup> H- <sup>1</sup> H NOESY 2D NMR | Page 2  |
| Compound 1b             | <sup>1</sup> H and <sup>13</sup> C NMR                                             | Page 6  |
| MeO-Cl-DNQ              | <sup>1</sup> H and <sup>13</sup> C NMR                                             | Page 8  |
| Compound 2              | <sup>1</sup> H and <sup>13</sup> C NMR                                             | Page 10 |
| EtO-Cl-DNQ              | <sup>1</sup> H and <sup>13</sup> C NMR                                             | Page 12 |
| BuO-Cl-DNQ              | <sup>1</sup> H and <sup>13</sup> C NMR                                             | Page 14 |
| <i>i</i> -BuO-Cl-DNQ    | <sup>1</sup> H and <sup>13</sup> C NMR                                             | Page 16 |
| <i>i</i> -PrO-Cl-DNQ    | <sup>1</sup> H and <sup>13</sup> C NMR                                             | Page 18 |
| PhetO-Cl-DNQ            | <sup>1</sup> H and <sup>13</sup> C NMR                                             | Page 20 |
| AllylO-Cl-DNQ           | <sup>1</sup> H and <sup>13</sup> C NMR                                             | Page 22 |
| PrgO-Cl-DNQ             | <sup>1</sup> H and <sup>13</sup> C NMR                                             | Page 24 |
| MeO-Br-DNQ              | <sup>1</sup> H and <sup>13</sup> C NMR                                             | Page 26 |
| Compound 3              | <sup>1</sup> H and <sup>13</sup> C NMR                                             | Page 28 |
| Compound 6              | <sup>1</sup> H and <sup>13</sup> C NMR                                             | Page 30 |
| Compound 7              | <sup>1</sup> H and <sup>13</sup> C NMR                                             | Page 32 |
| Compound 8              | <sup>1</sup> H and <sup>13</sup> C NMR                                             | Page 34 |
| Compound 9              | <sup>1</sup> H and <sup>13</sup> C NMR                                             | Page 36 |
| Compound 11             | <sup>1</sup> H and <sup>13</sup> C NMR                                             | Page 38 |
| Compound 13             | <sup>1</sup> H and <sup>13</sup> C NMR                                             | Page 40 |
| Compound 15             | <sup>1</sup> H and <sup>13</sup> C NMR                                             | Page 42 |
| NH <sub>2</sub> -Cl-DNQ | <sup>1</sup> H and <sup>13</sup> C NMR                                             | Page 44 |
| Compound 16             | <sup>1</sup> H and <sup>13</sup> C NMR                                             | Page 46 |

### Compound 1a

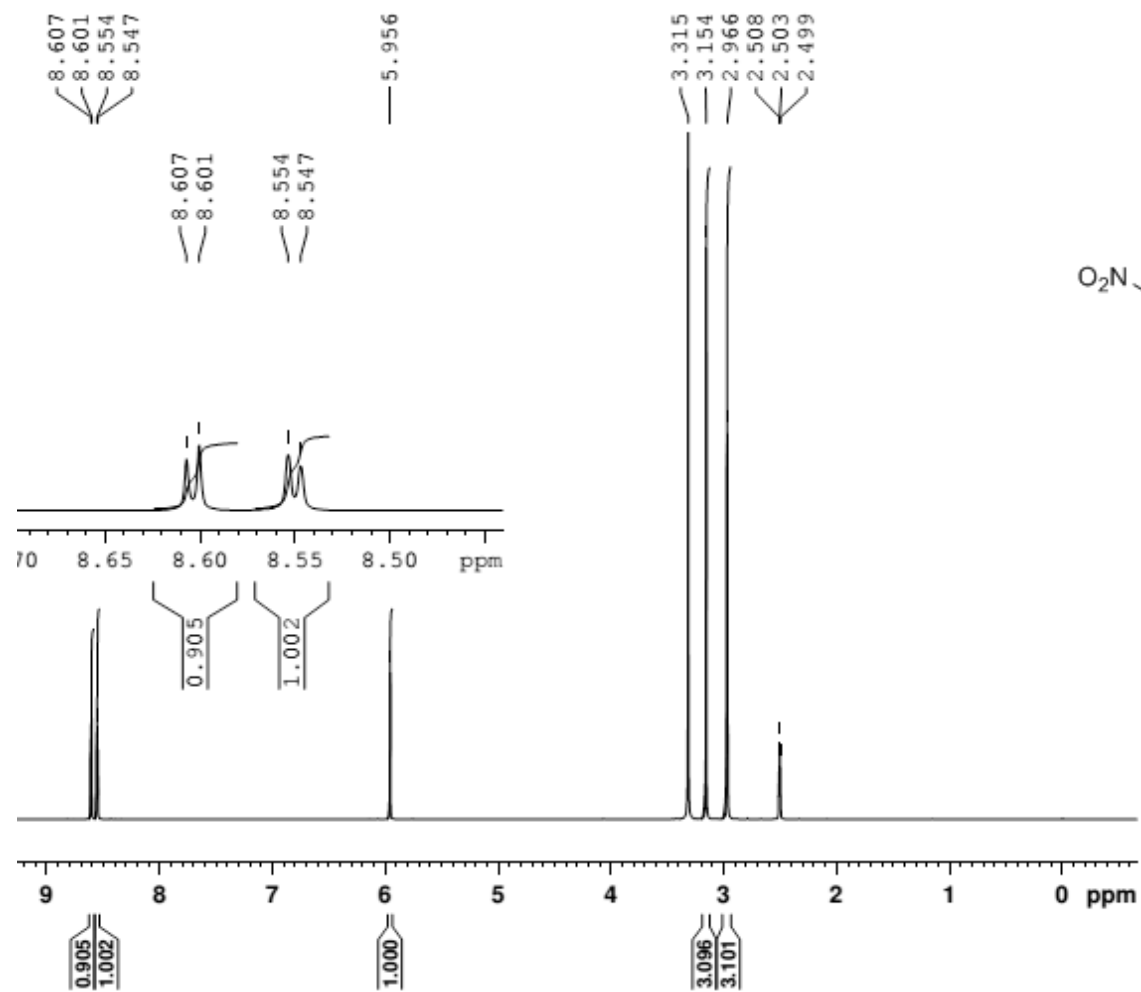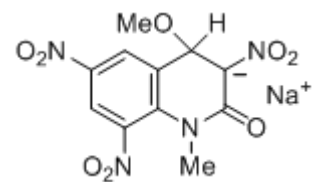

<sup>1</sup>H NMR (400 MHz) in DMSO-*d*<sub>6</sub>

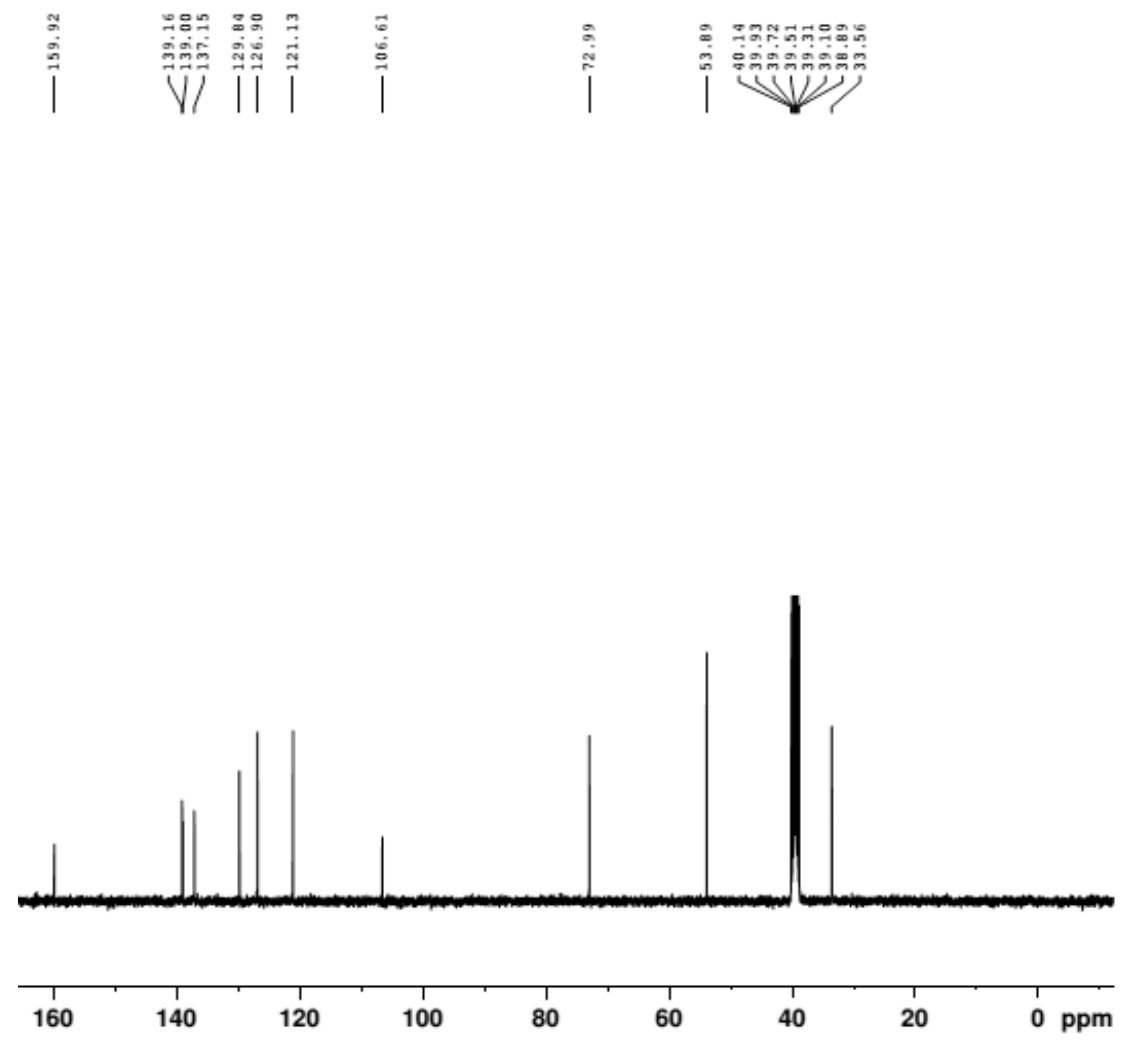

$^{13}\text{C}$  NMR (100 MHz) in  $\text{DMSO-}d_6$

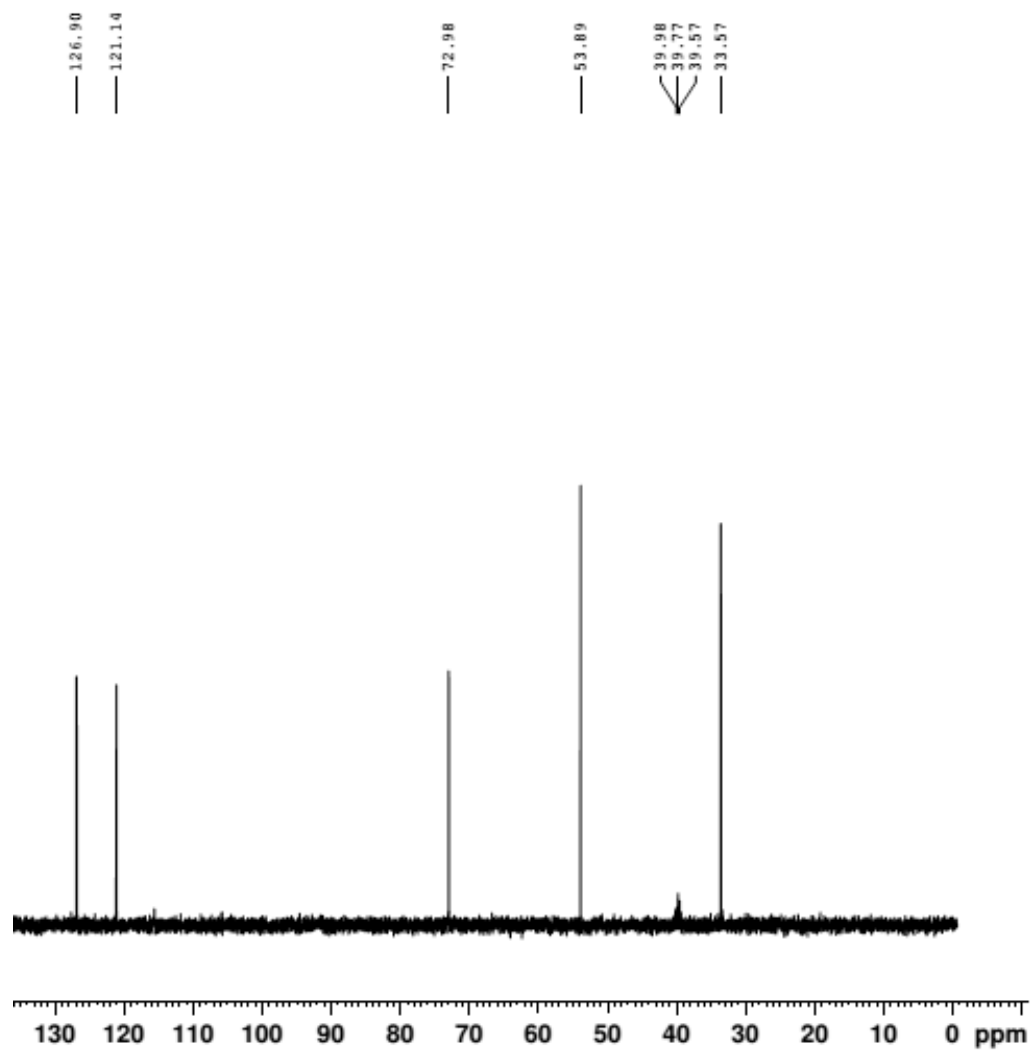

DEPT-135 in DMSO-*d*<sub>6</sub>

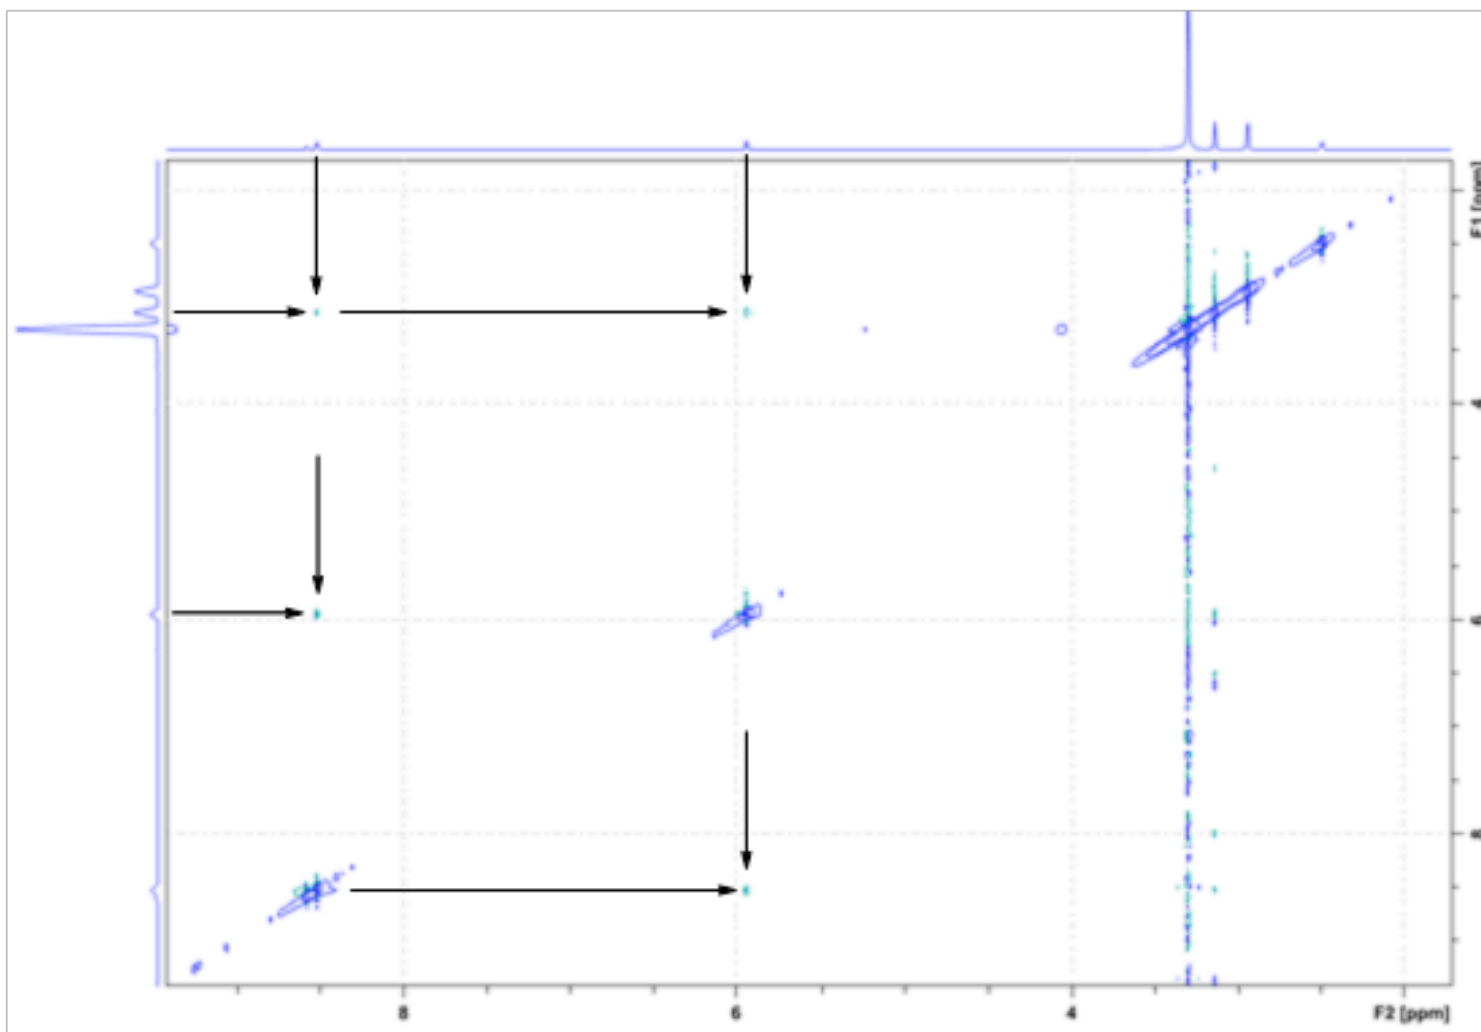

$^1\text{H}$ - $^1\text{H}$  NOESY in  $\text{DMSO-}d_6$

### Compound 1b

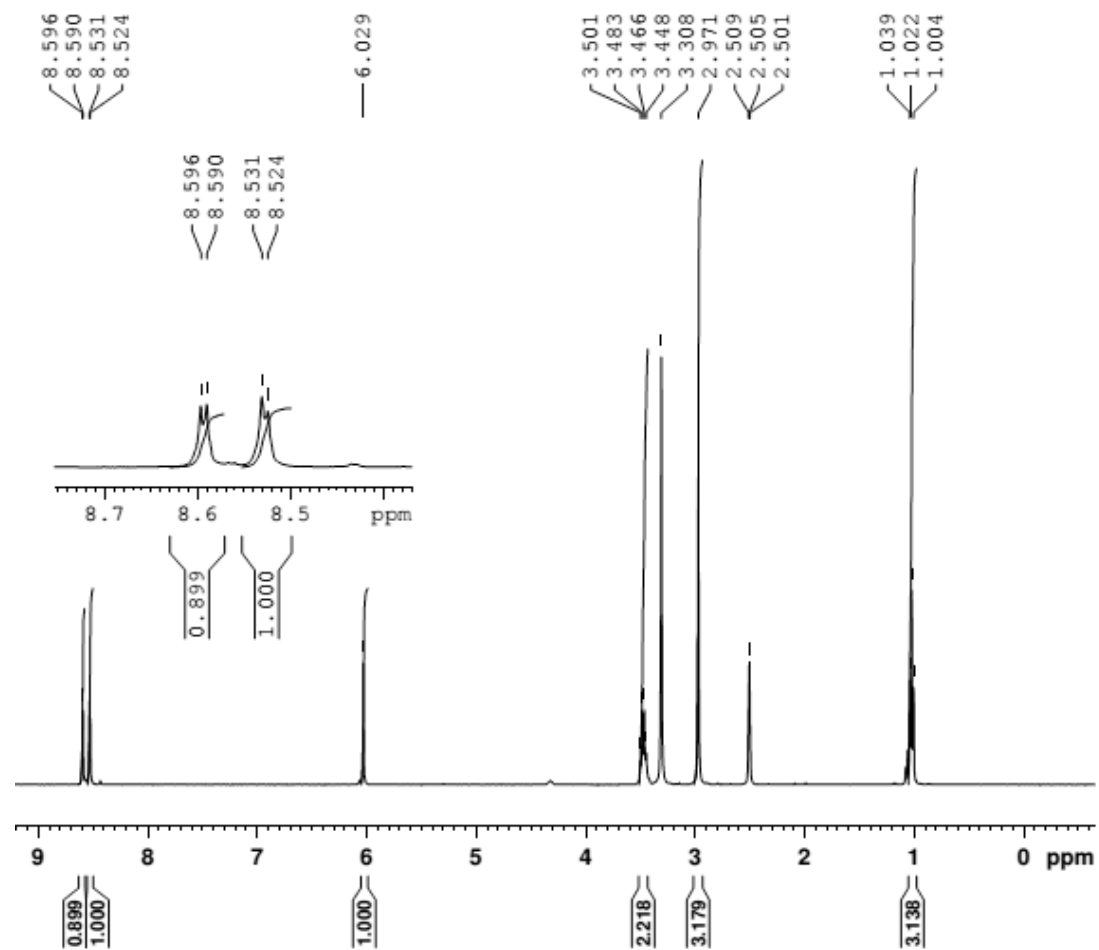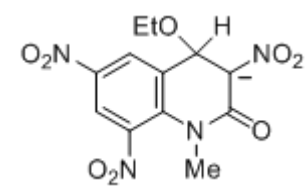

<sup>1</sup>H NMR (400 MHz) in DMSO-*d*<sub>6</sub>

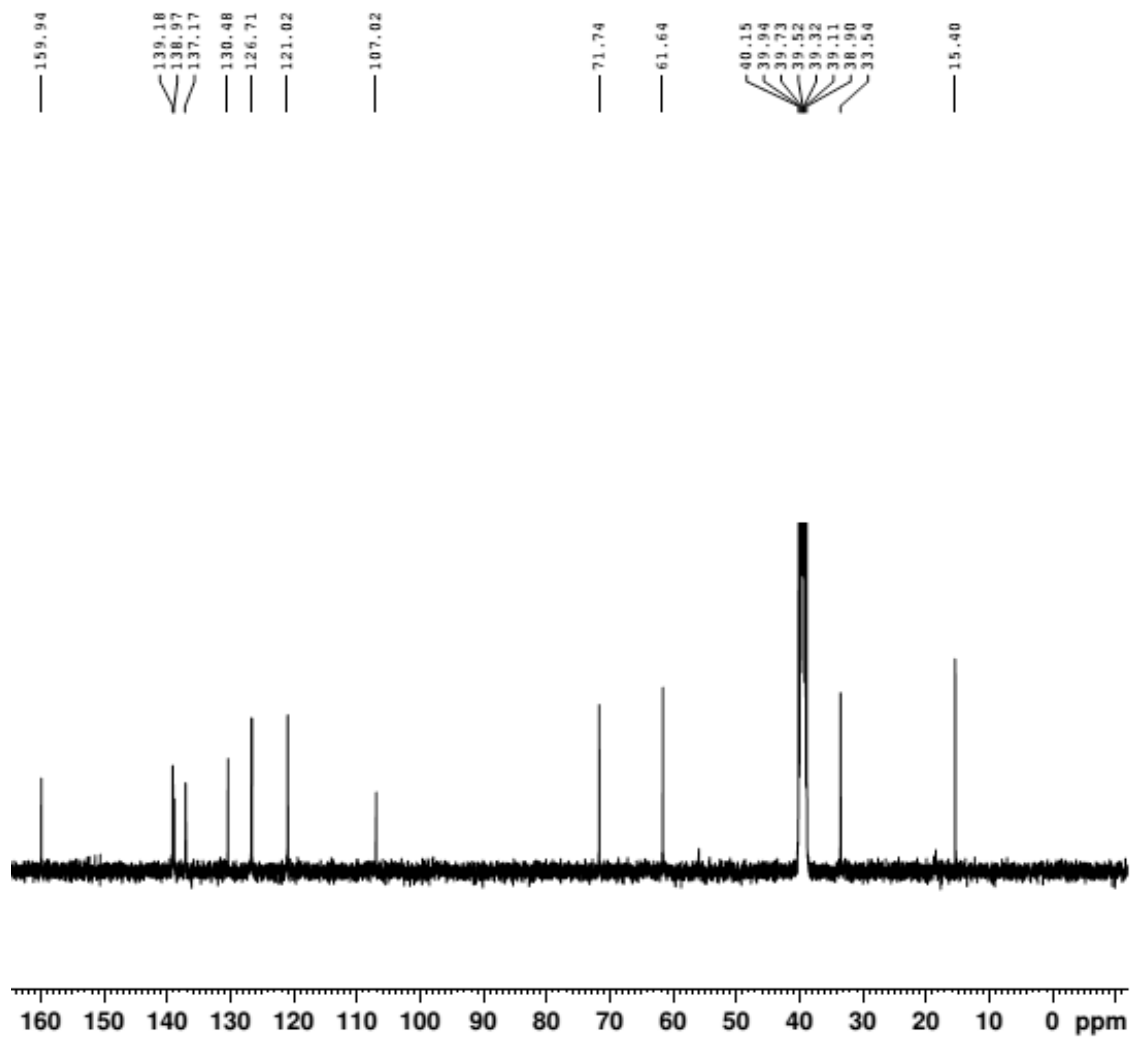

$^{13}\text{C}$  NMR (100 MHz) in  $\text{DMSO}-d_6$

MeO-Cl-DNQ

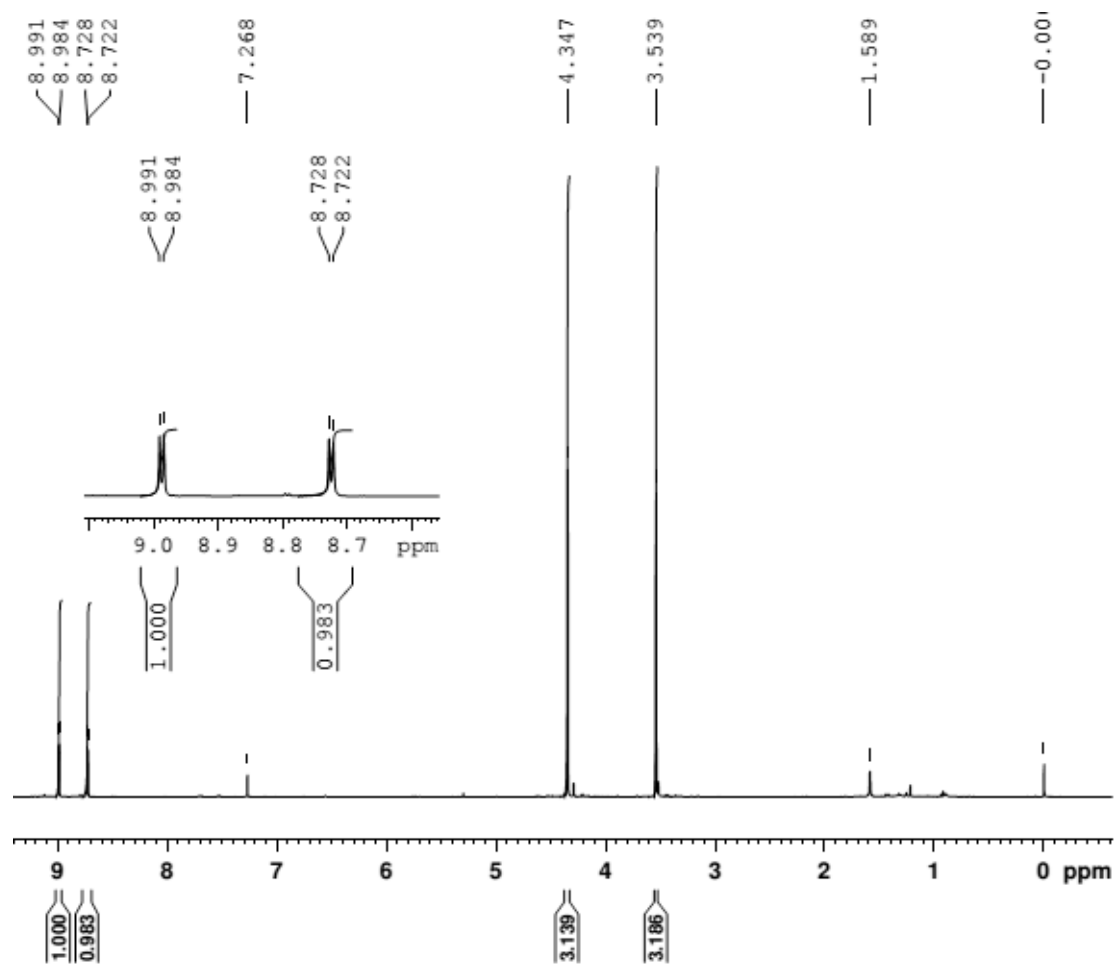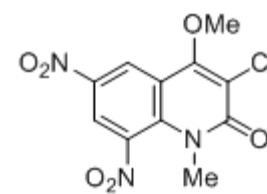

<sup>1</sup>H NMR (400 MHz) in CDCl<sub>3</sub>



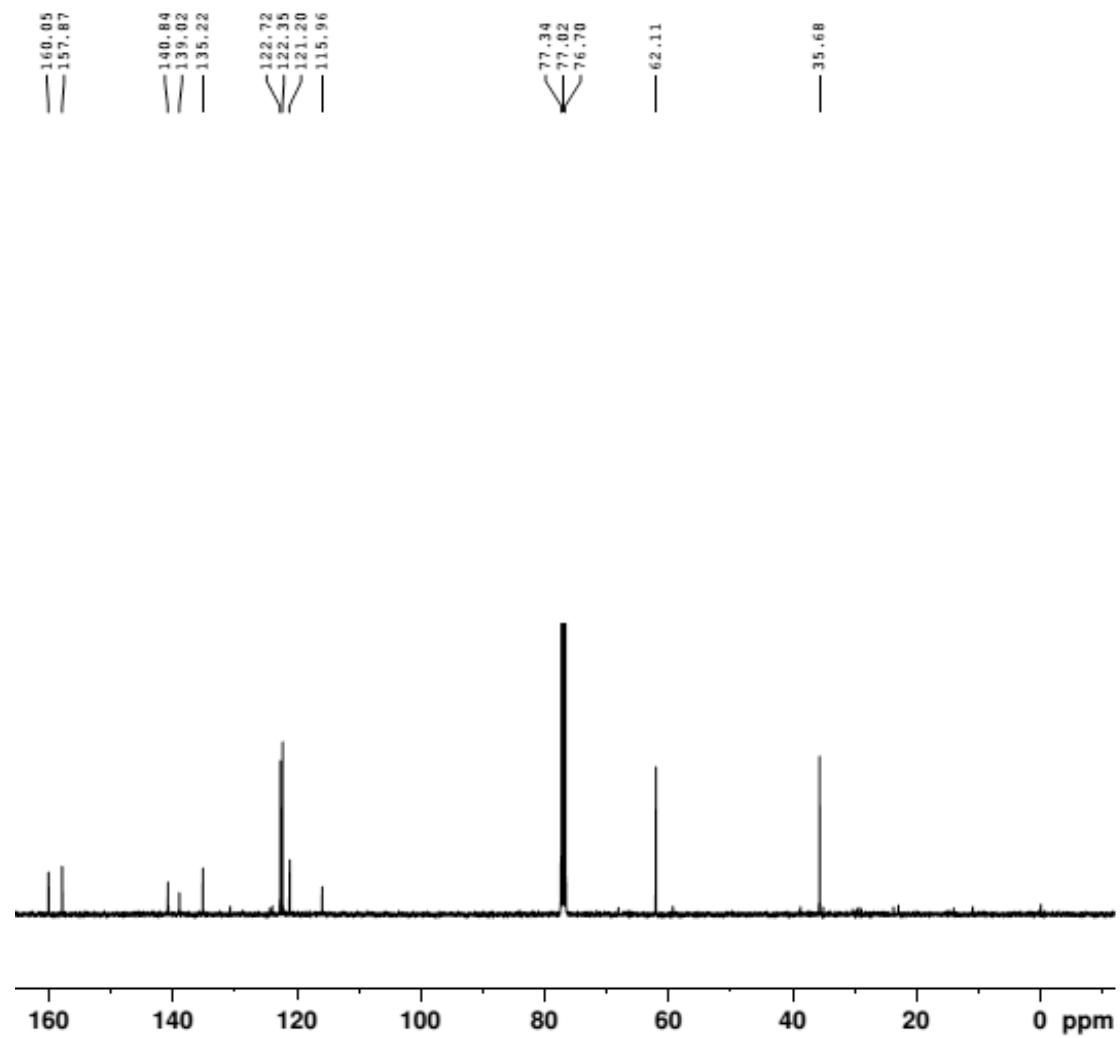

<sup>13</sup>C NMR (100 MHz) in CDCl<sub>3</sub>

### Compound 2

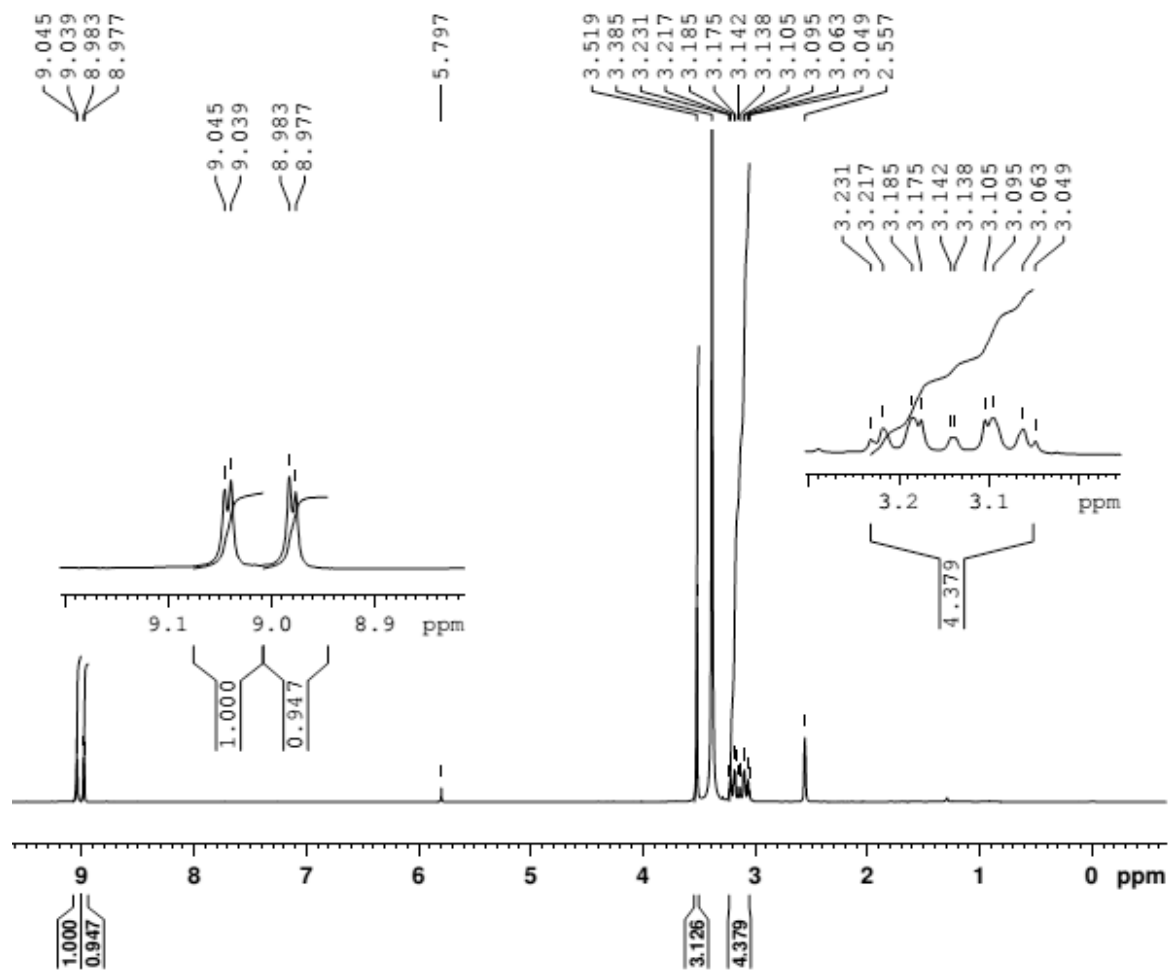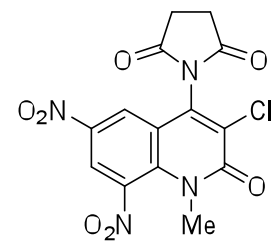

<sup>1</sup>H NMR (400 MHz) DMSO-d<sub>6</sub>

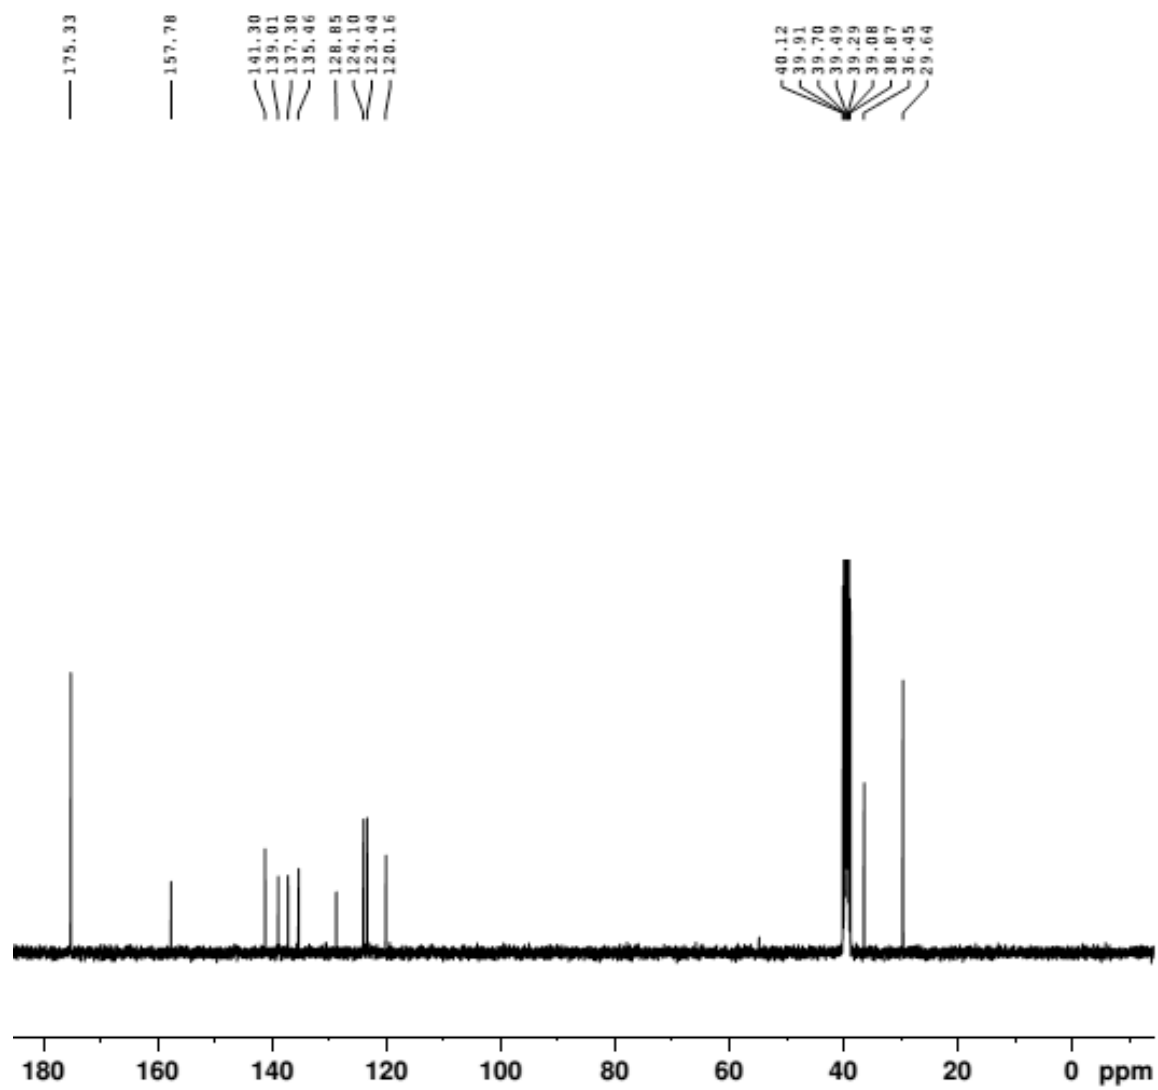

$^{13}\text{C}$  NMR (100 MHz) DMSO- $d_6$

**EtO-CI-DNQ**

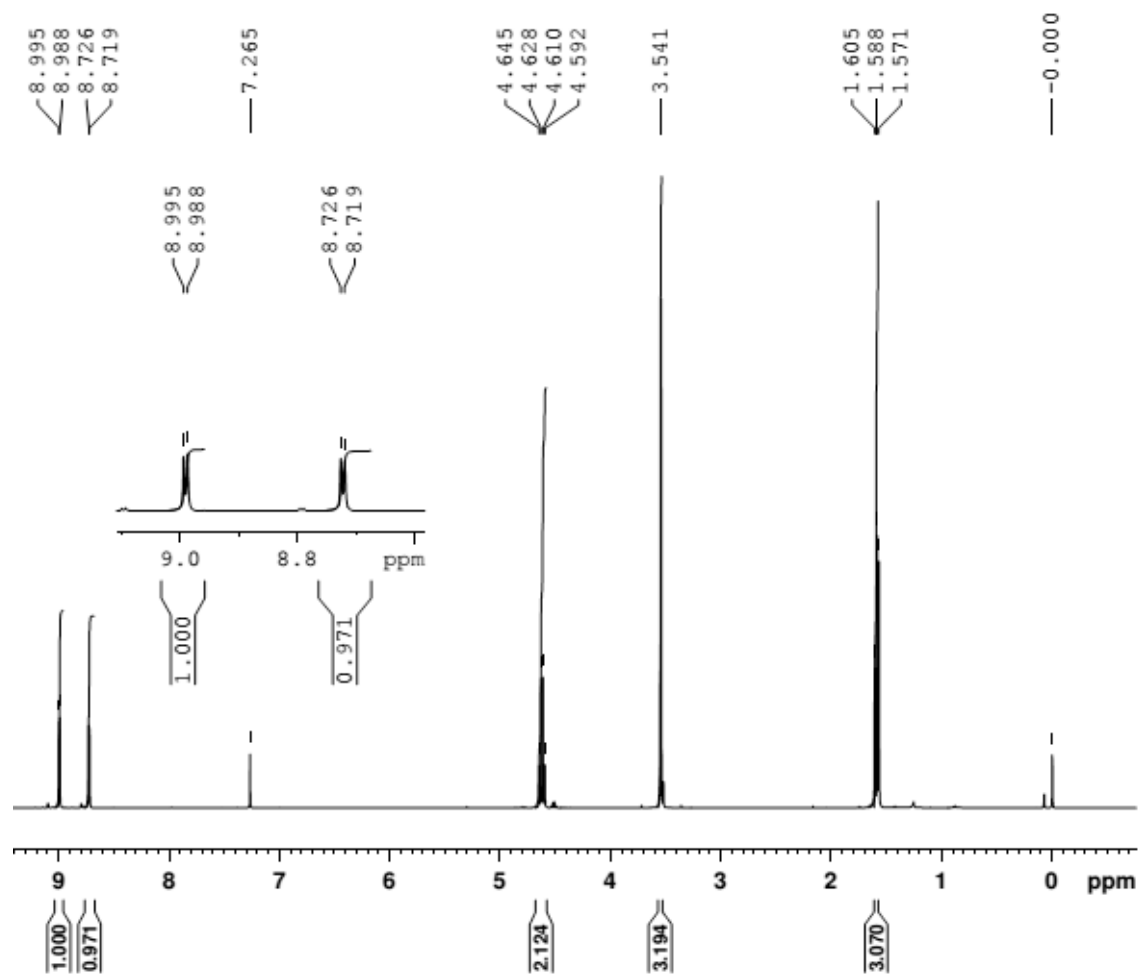

<sup>1</sup>H NMR (400 MHz) in CDCl<sub>3</sub>

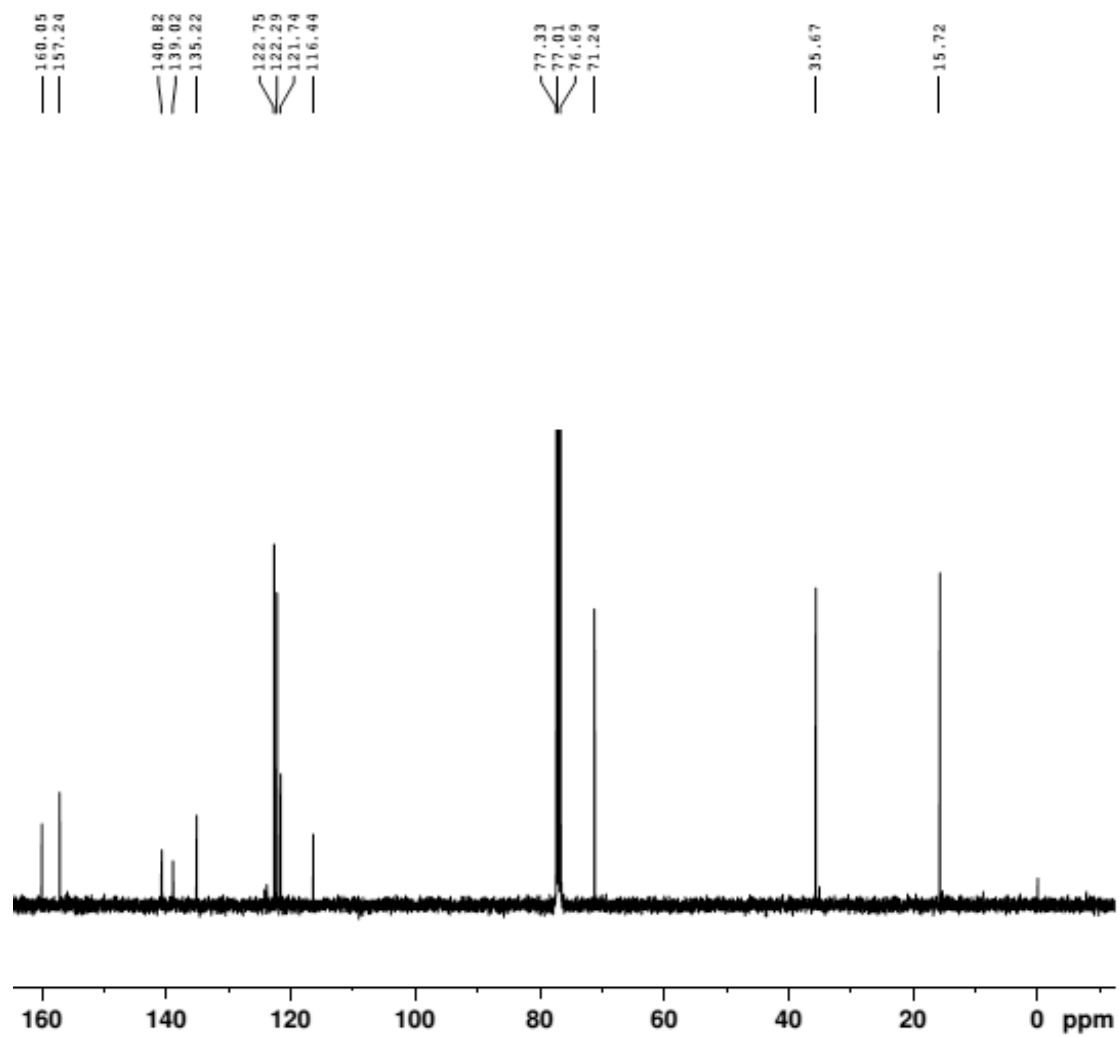

$^{13}\text{C}$  NMR (100 MHz) in  $\text{CDCl}_3$

BuO-Cl-DNQ

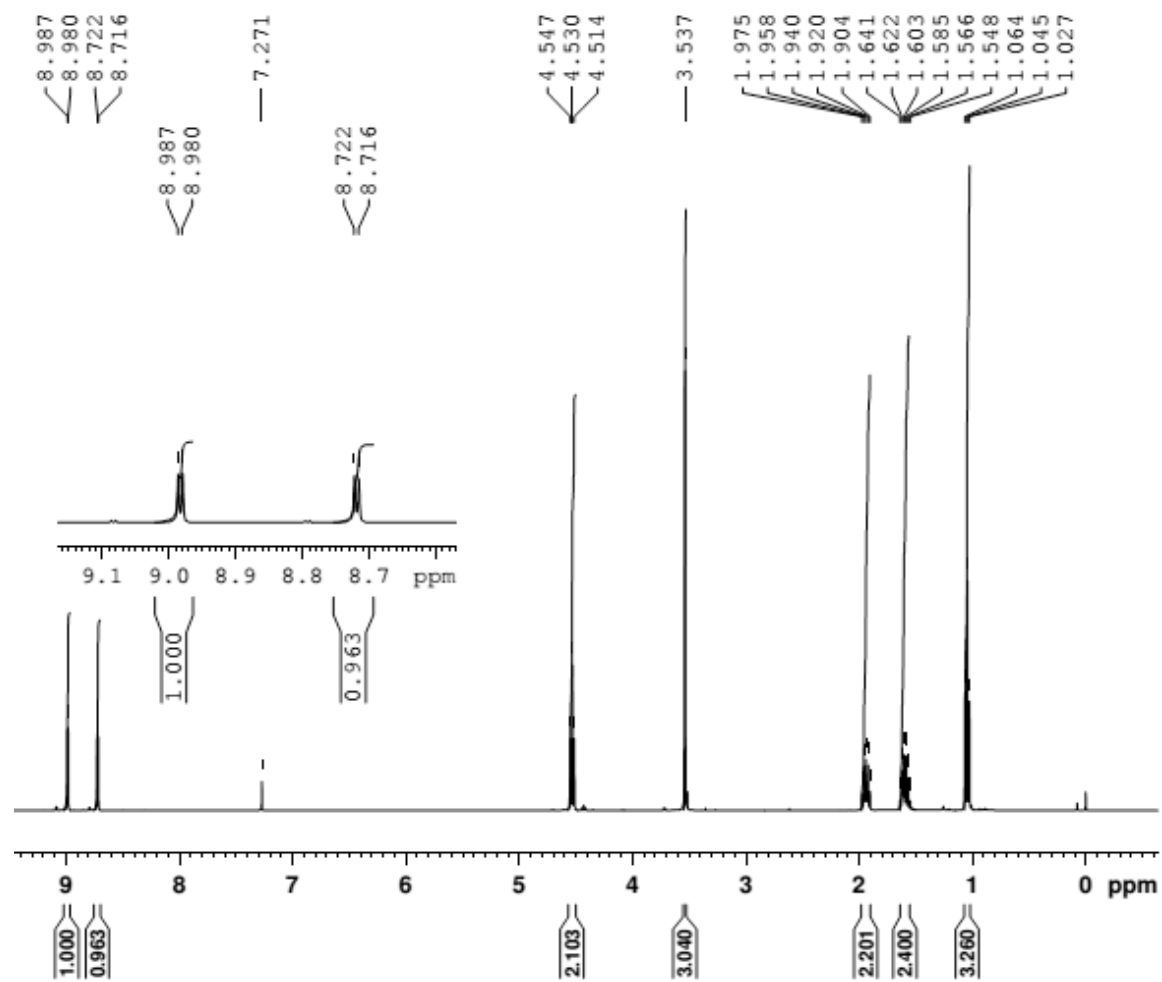

<sup>1</sup>H NMR (400 MHz) in CDCl<sub>3</sub>

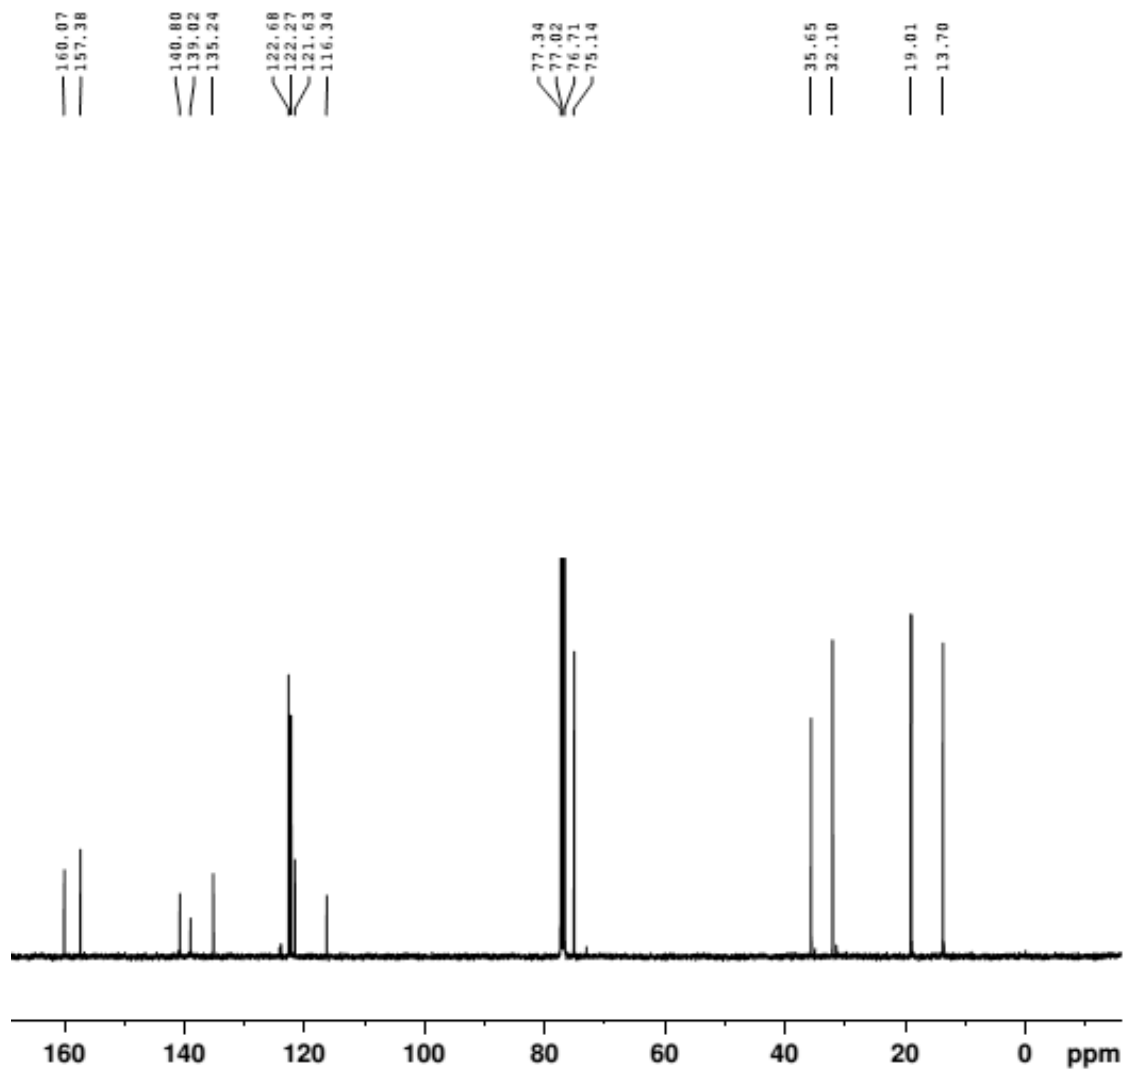

<sup>13</sup>C NMR (100 MHz) in CDCl<sub>3</sub>

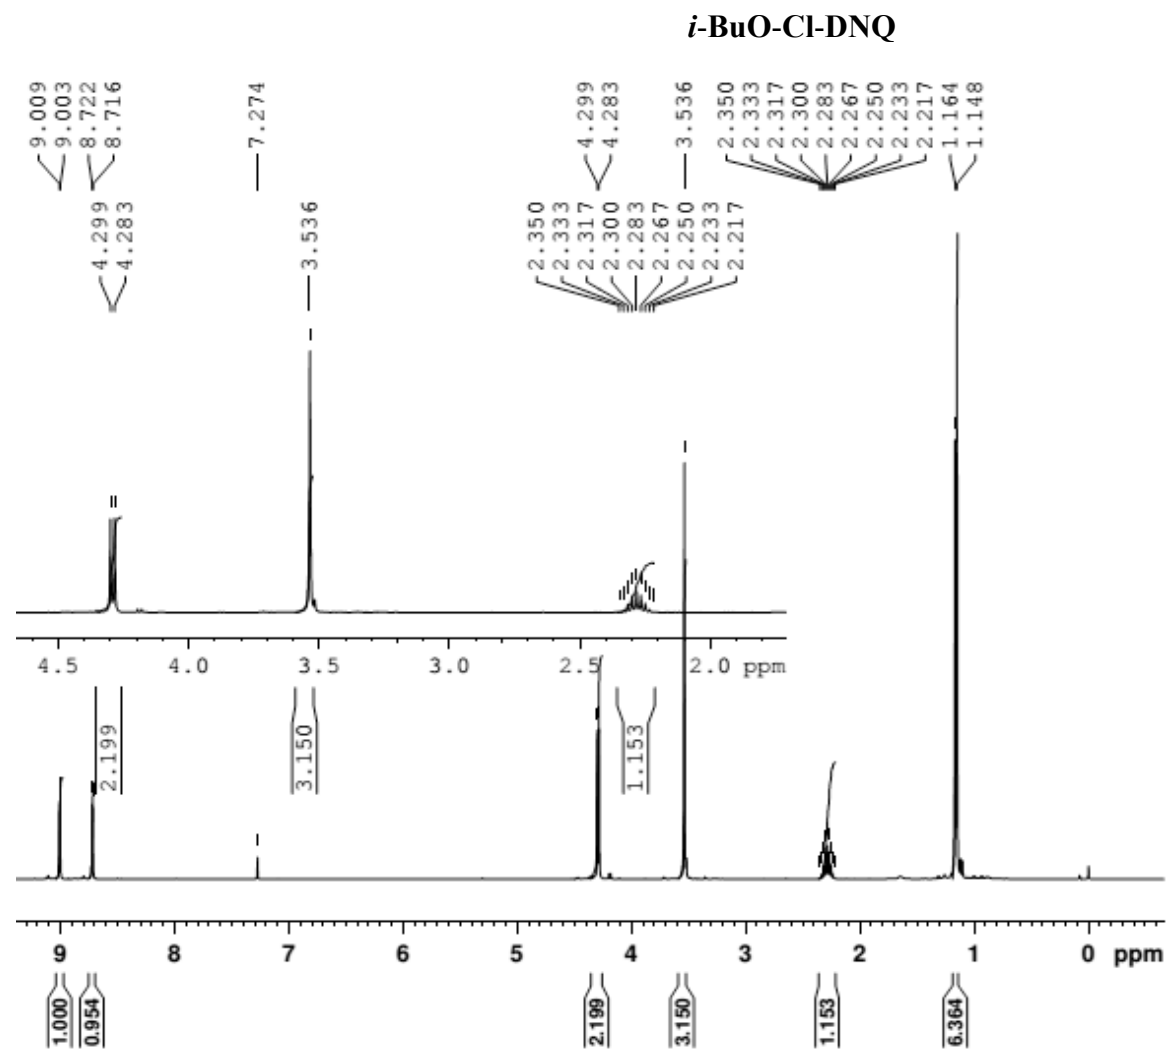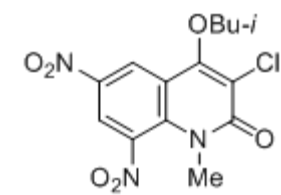

$^1\text{H}$  NMR (400 MHz) in  $\text{CDCl}_3$



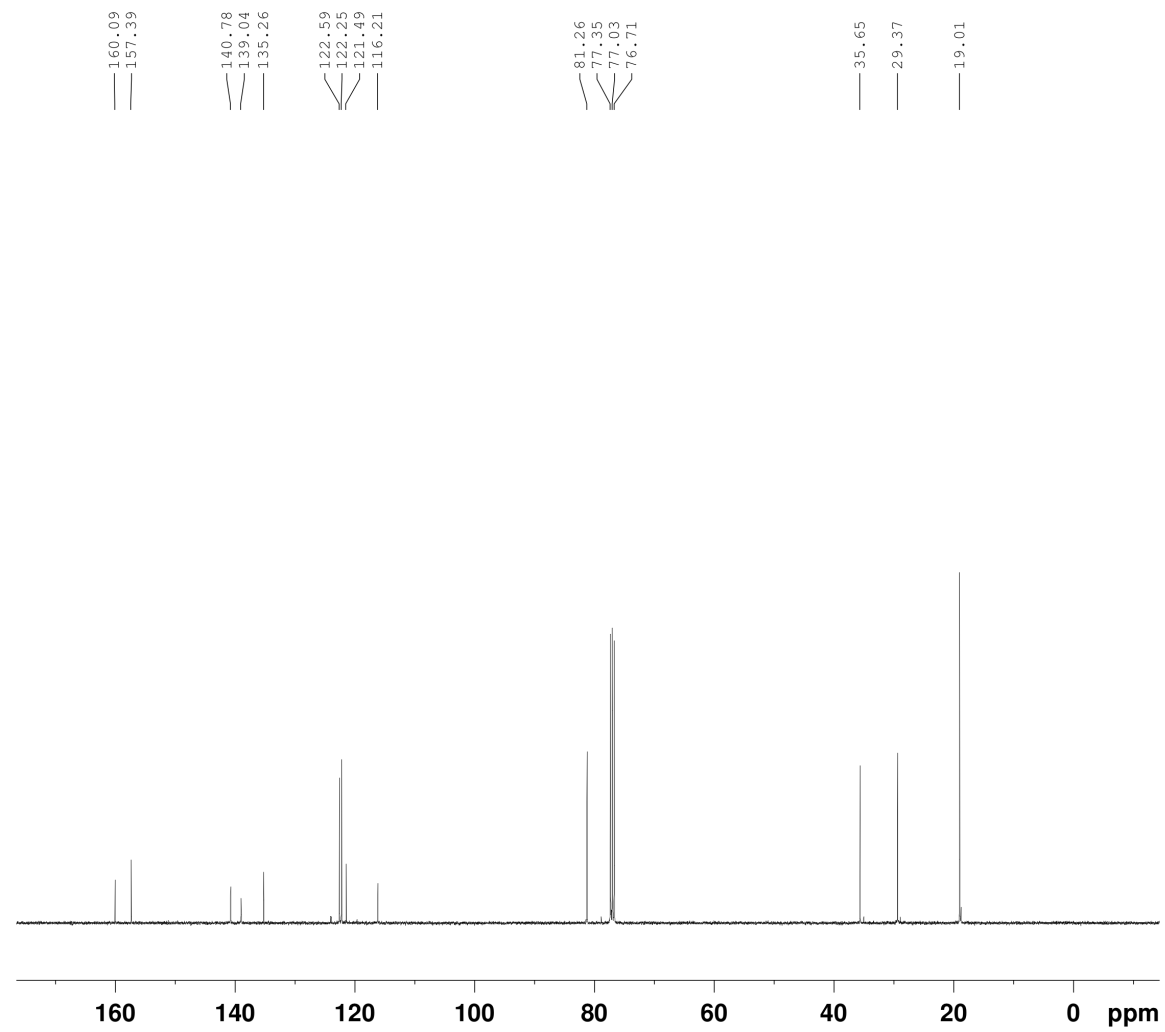

<sup>13</sup>C NMR (100 MHz) in CDCl<sub>3</sub>

*i*-PrO-Cl-DNQ

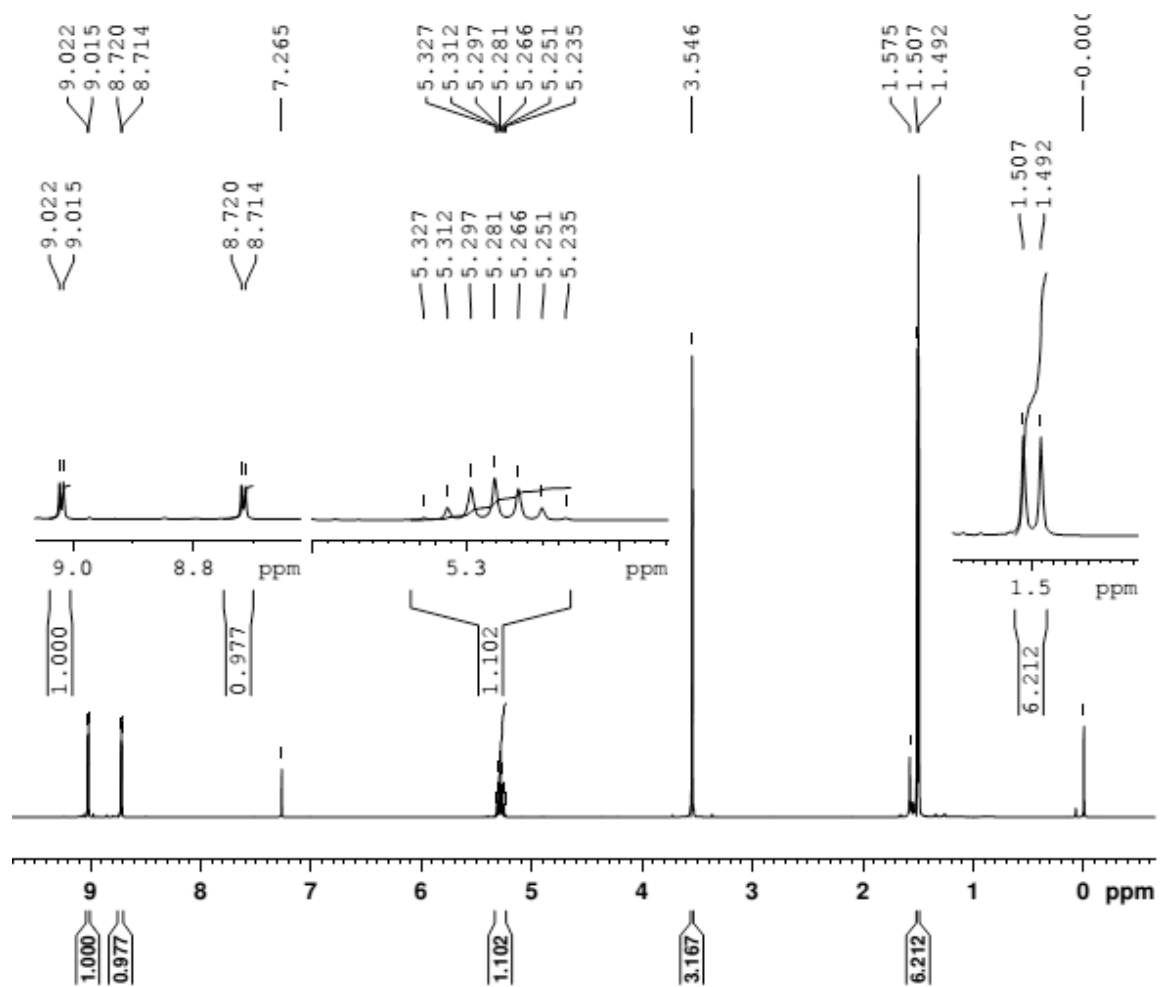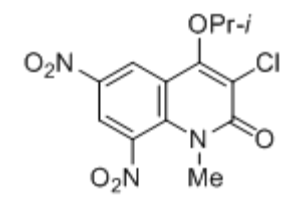

<sup>1</sup>H NMR (400 MHz) in CDCl<sub>3</sub>

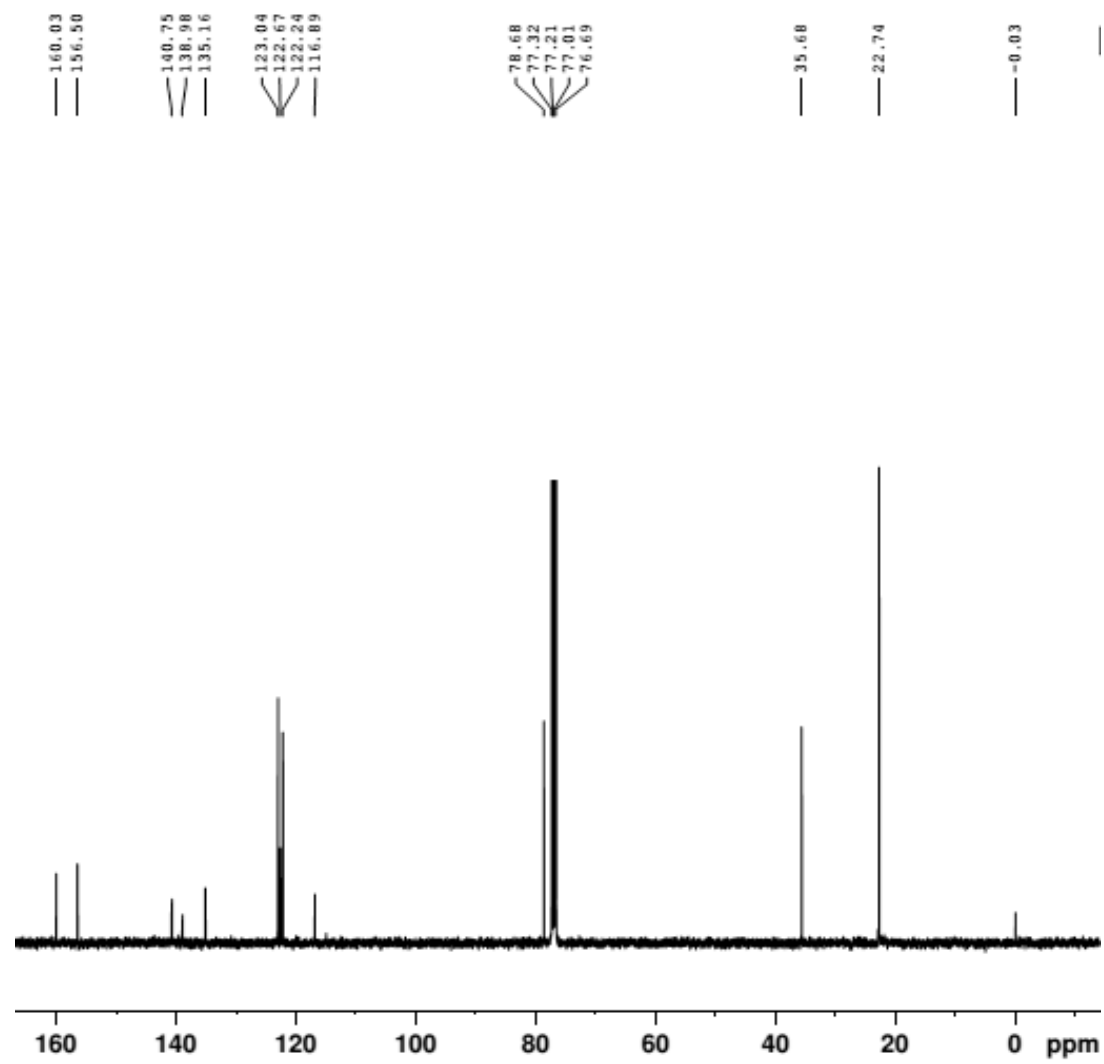

$^{13}\text{C}$  NMR (100 MHz) in  $\text{CDCl}_3$

PhetO-CI-DNQ

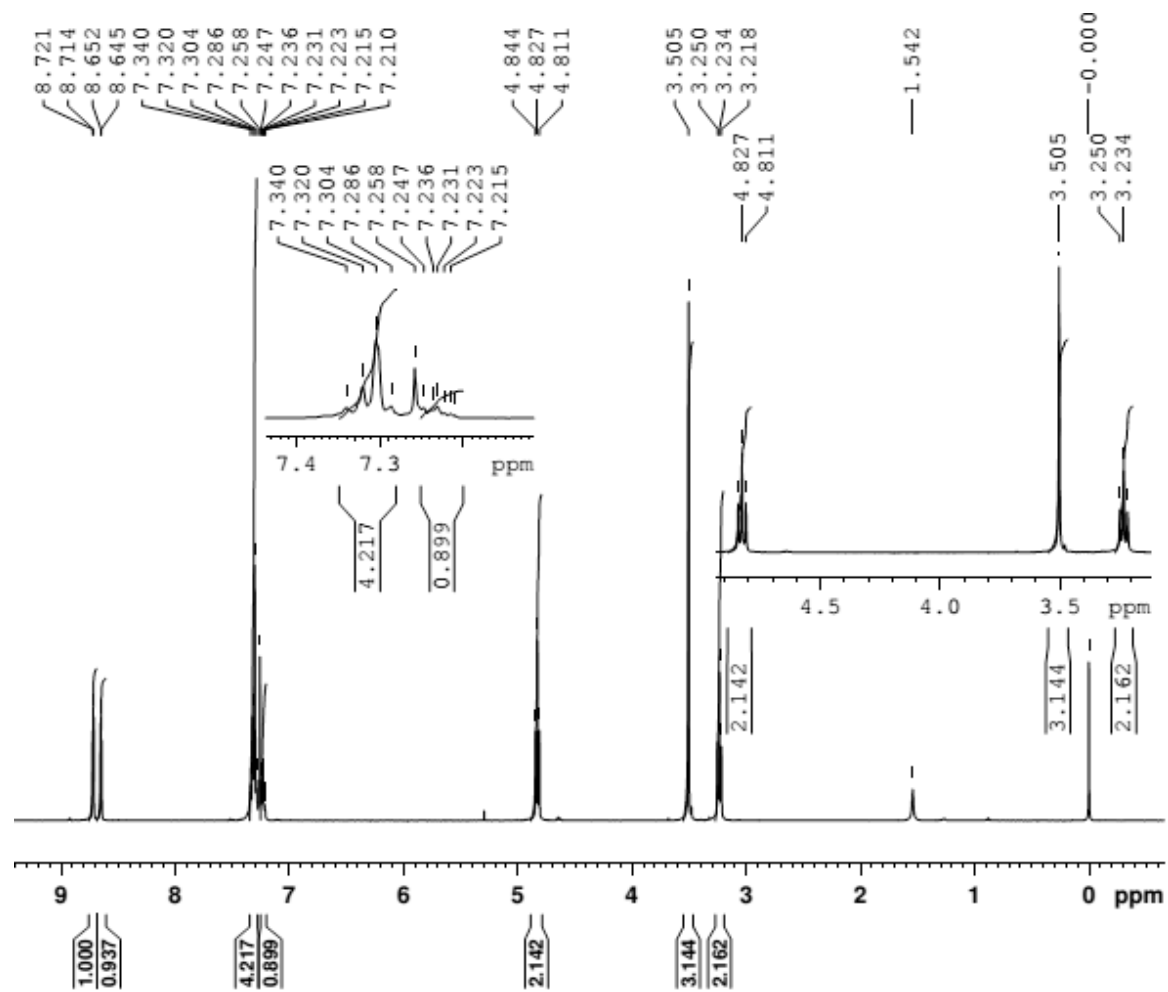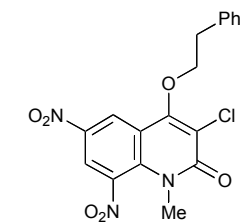

<sup>1</sup>H NMR (400 MHz) in CDCl<sub>3</sub>

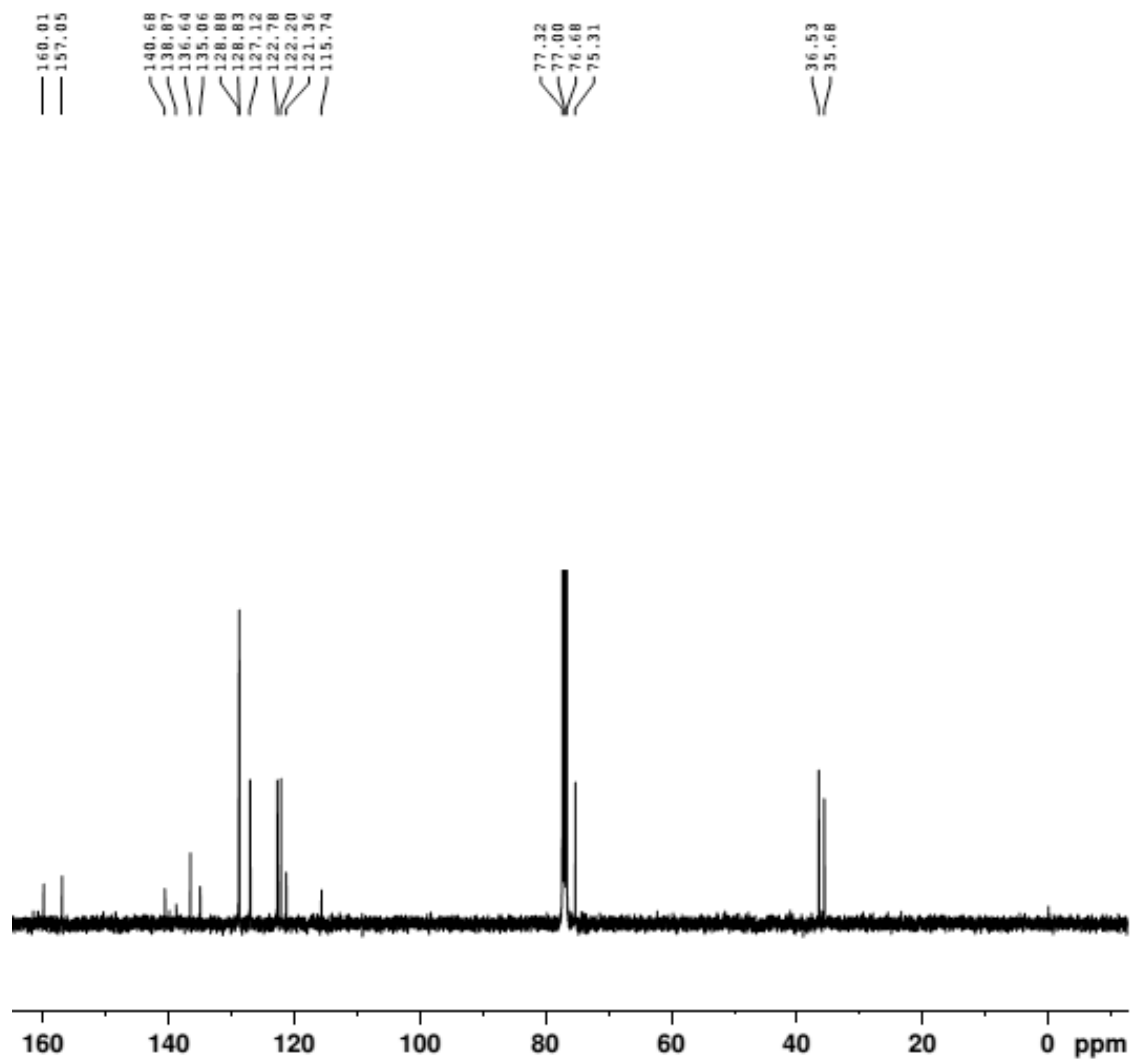

$^{13}\text{C}$  NMR (100 MHz) in  $\text{CDCl}_3$

### AllyIO-Cl-DNQ

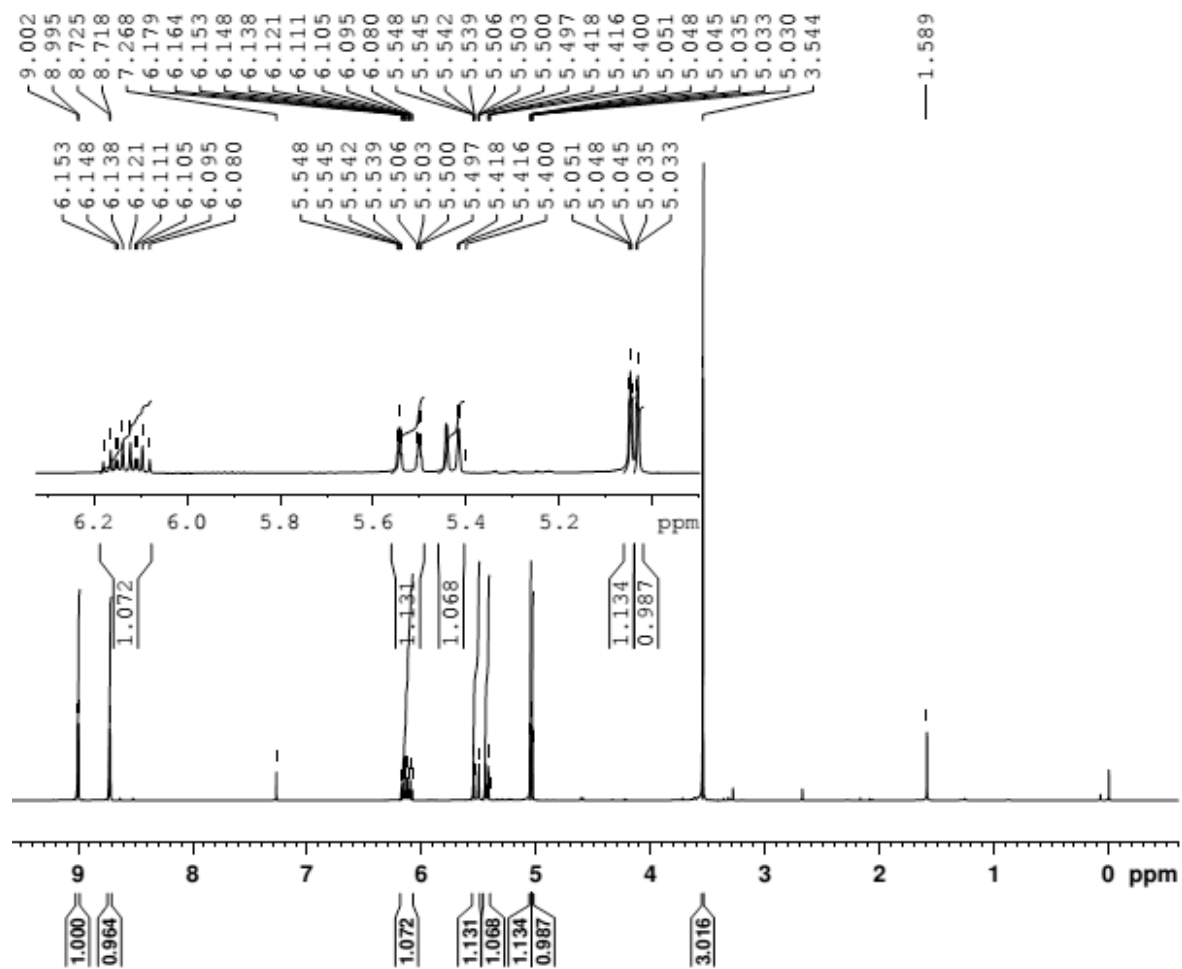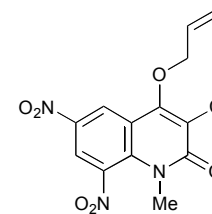

<sup>1</sup>H NMR (400 MHz) in CDCl<sub>3</sub>

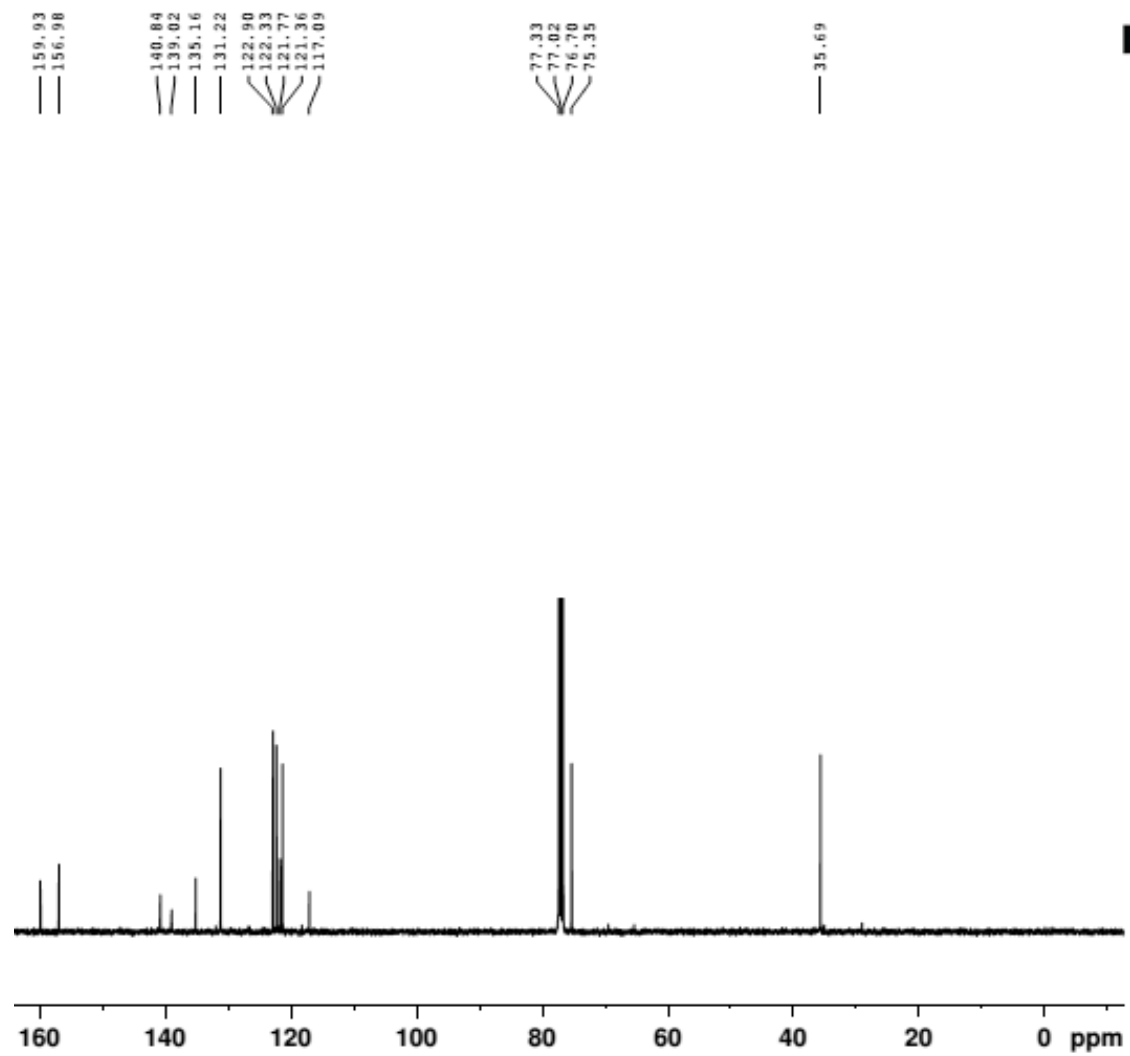

$^{13}\text{C}$  NMR (100 MHz) in  $\text{CDCl}_3$

PrgO-Cl-DNQ

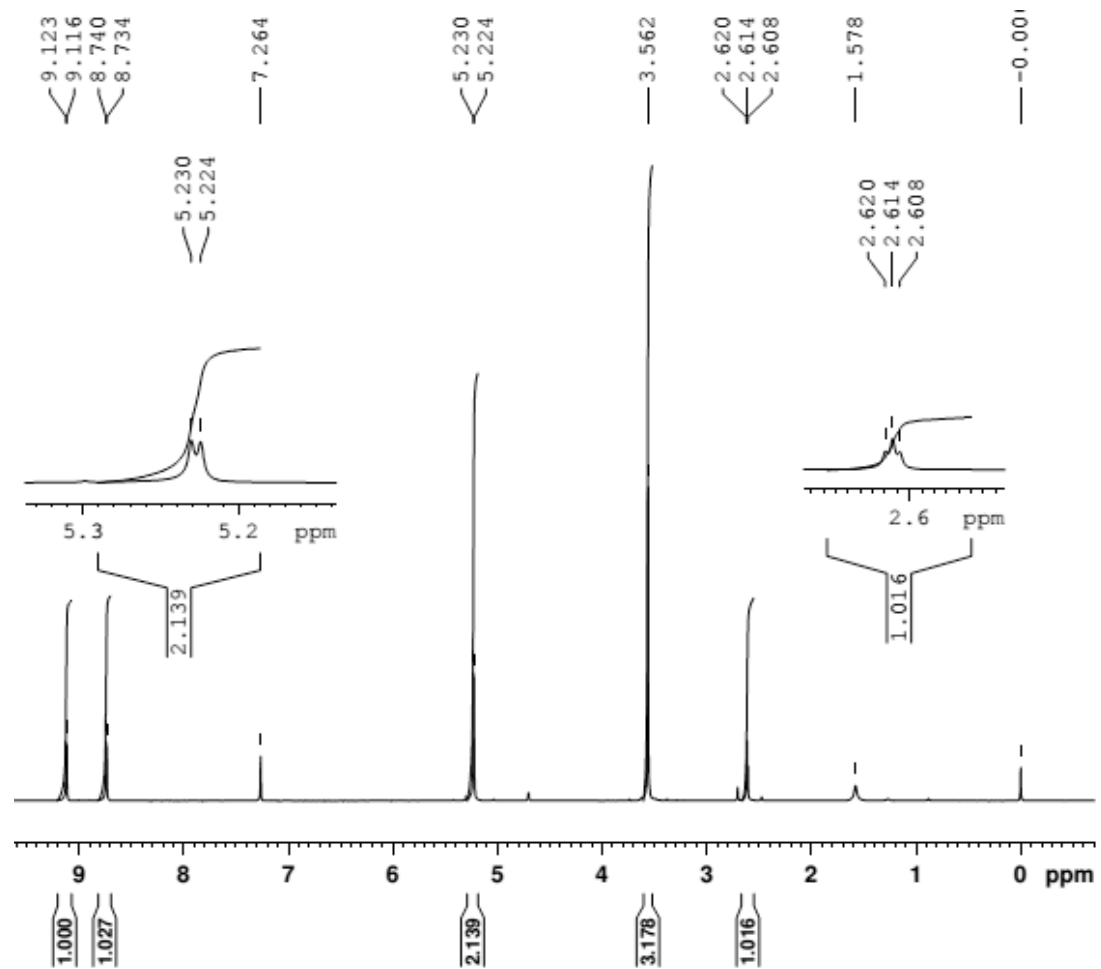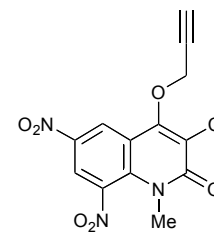

<sup>1</sup>H NMR (400 MHz) in CDCl<sub>3</sub>



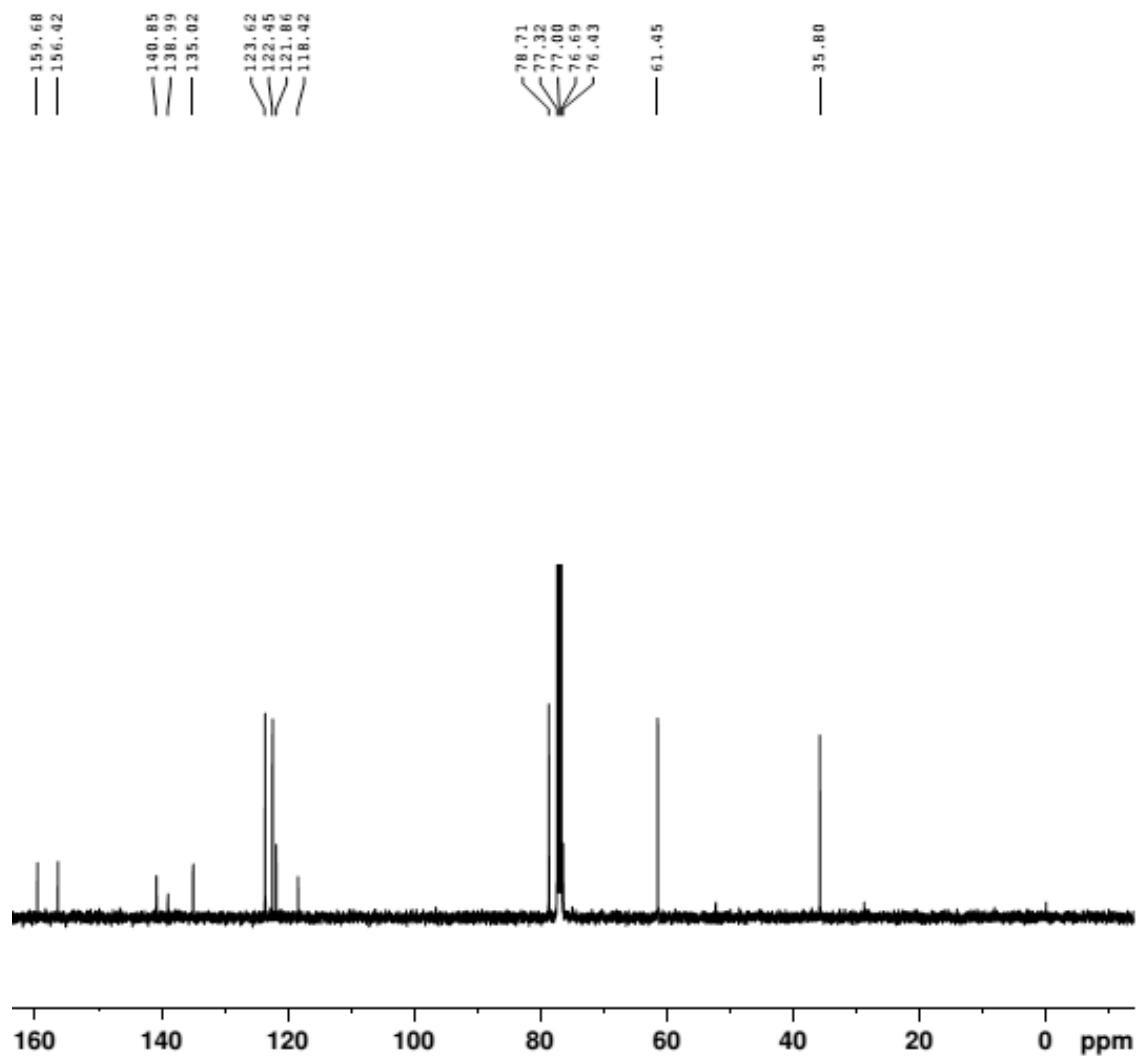

$^{13}\text{C}$  NMR (100 MHz) in  $\text{CDCl}_3$

MeO-Br-DNQ

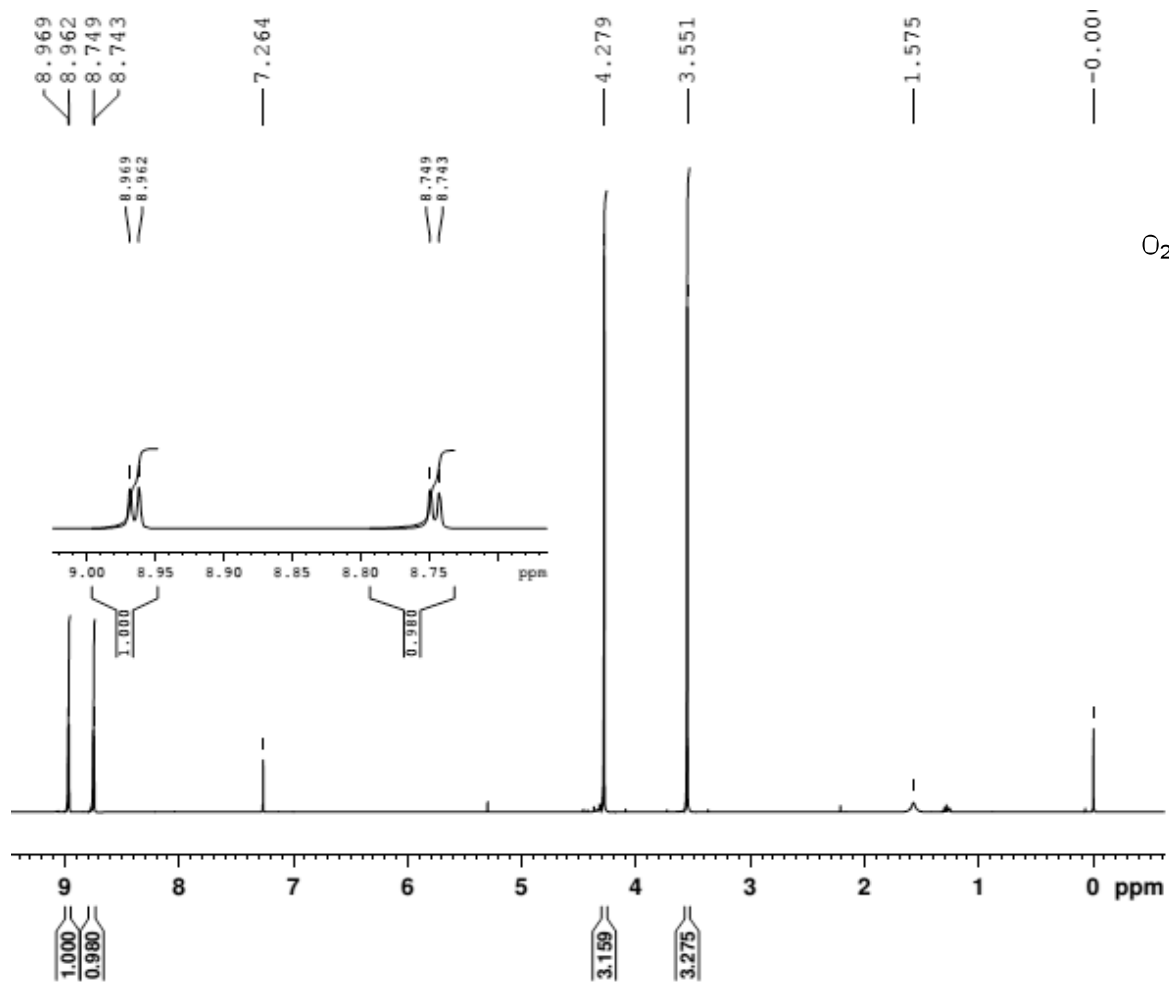

<sup>1</sup>H NMR (400 MHz) in CDCl<sub>3</sub>

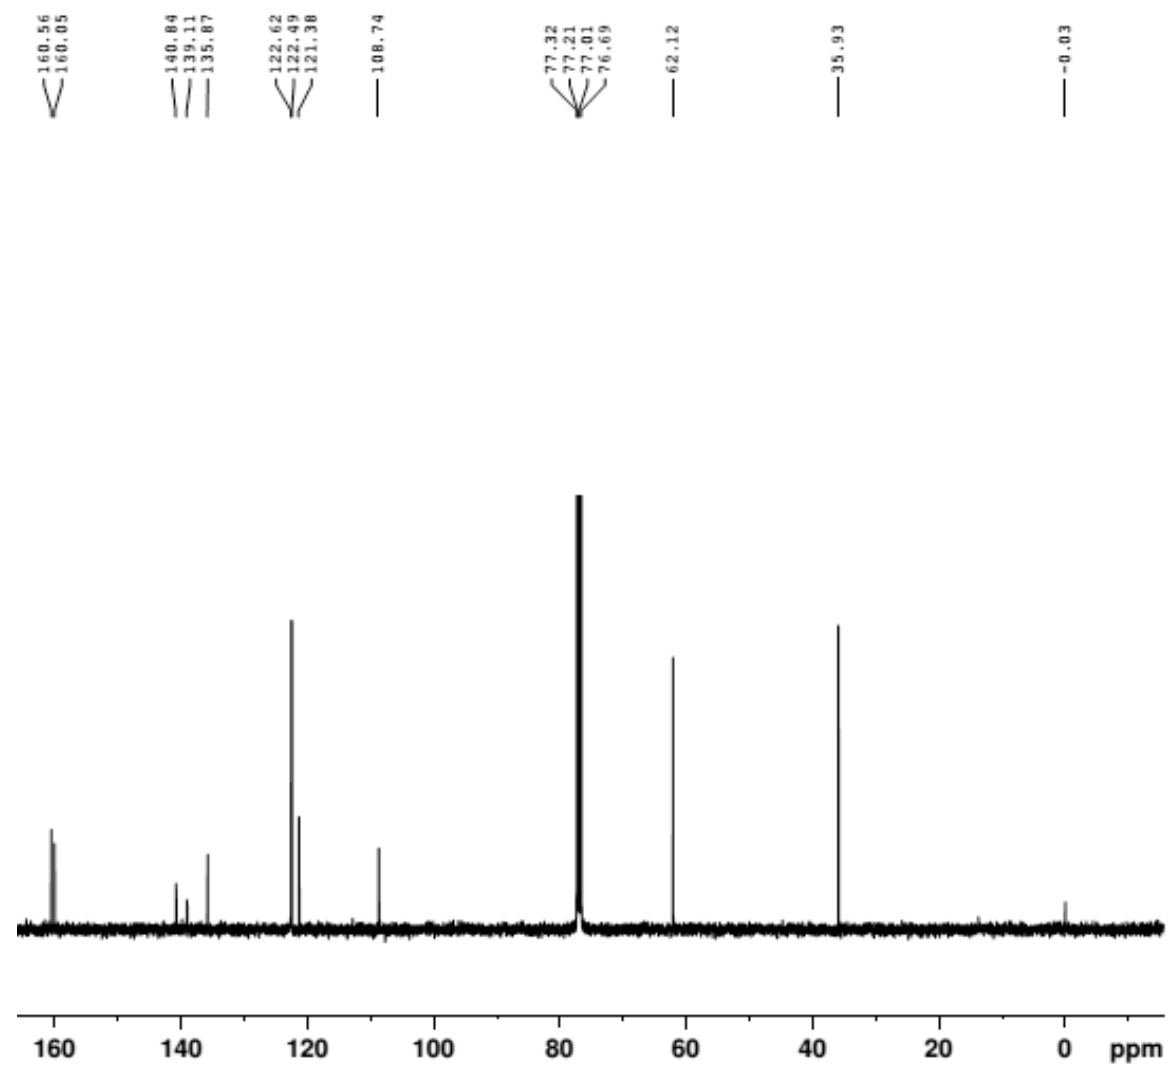

$^{13}\text{C}$  NMR (100 MHz) in  $\text{CDCl}_3$

### Compound 3

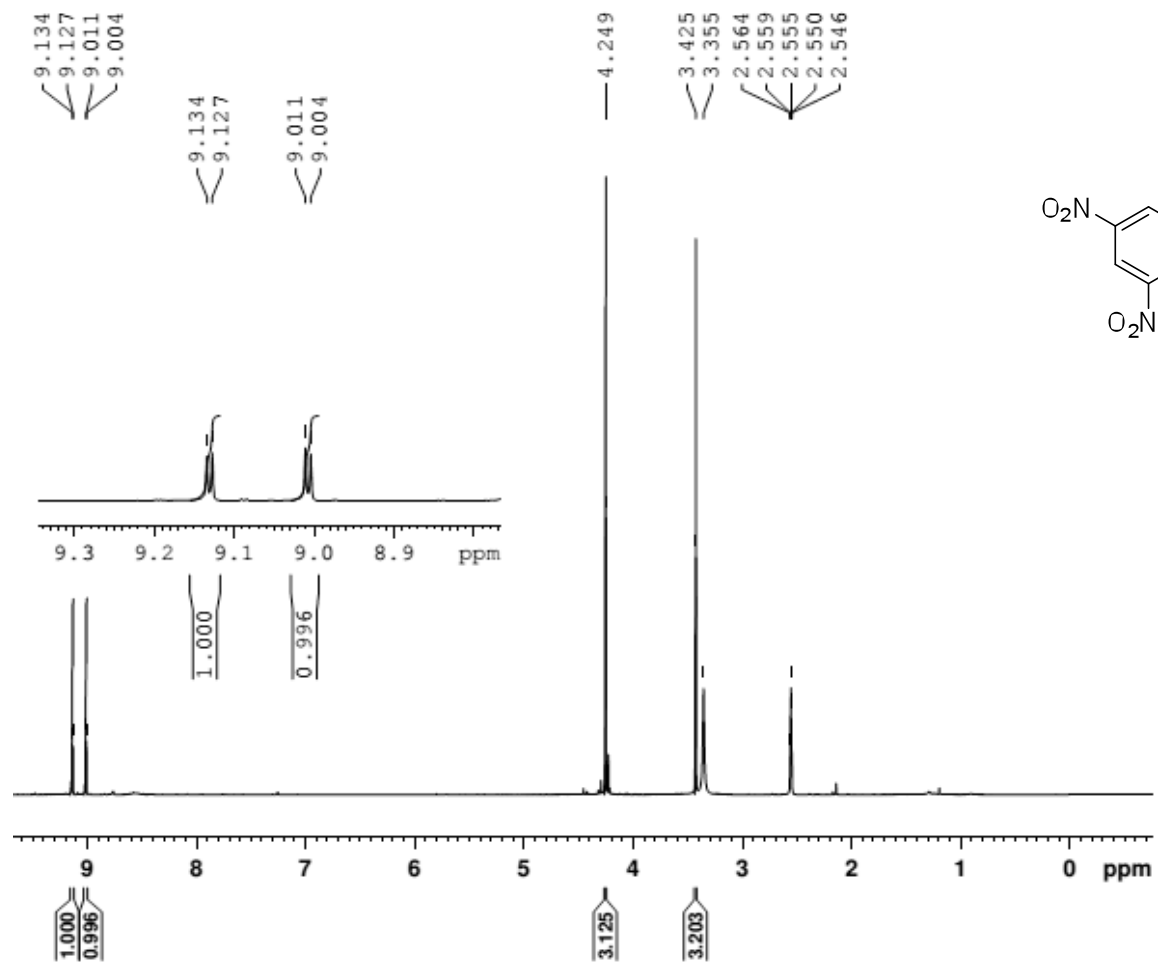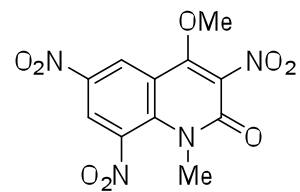

<sup>1</sup>H NMR (400 MHz) in DMSO-*d*<sub>6</sub>

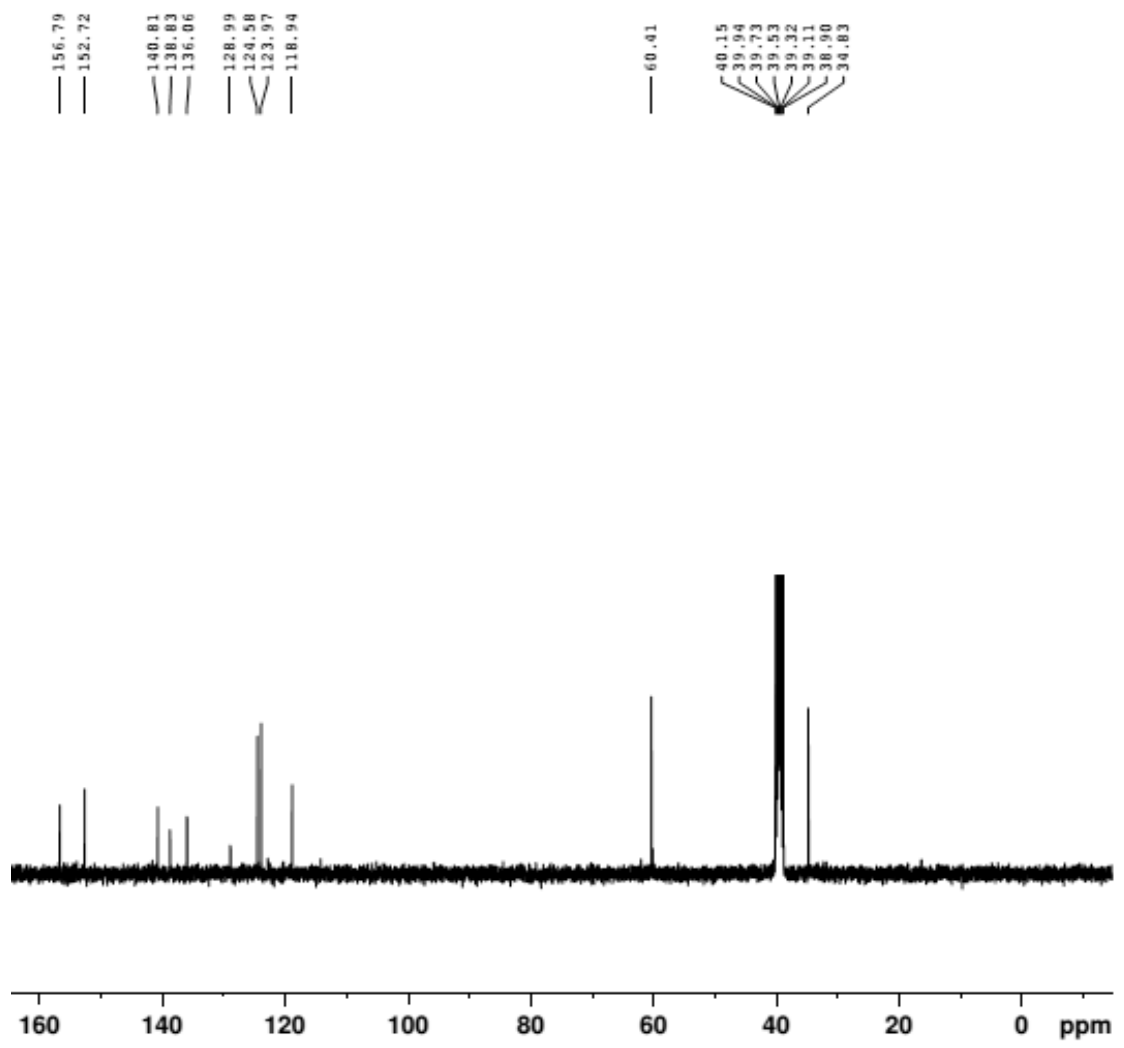

<sup>13</sup>C NMR (100 MHz) in DMSO-*d*<sub>6</sub>

### Compound 6

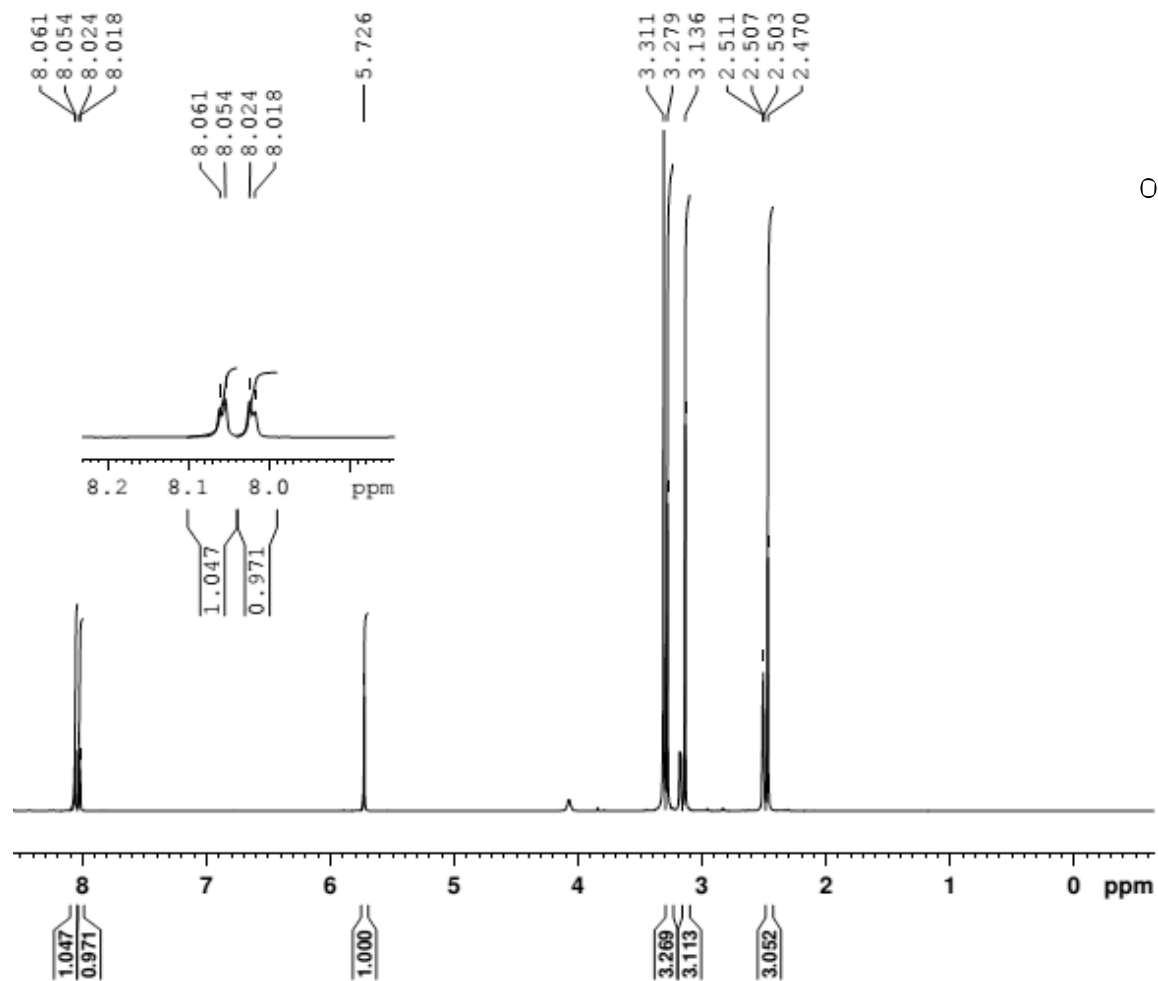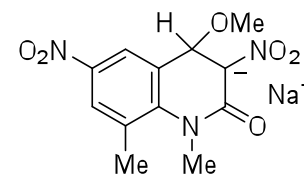

<sup>1</sup>H NMR (400 MHz) in DMSO-*d*<sub>6</sub>

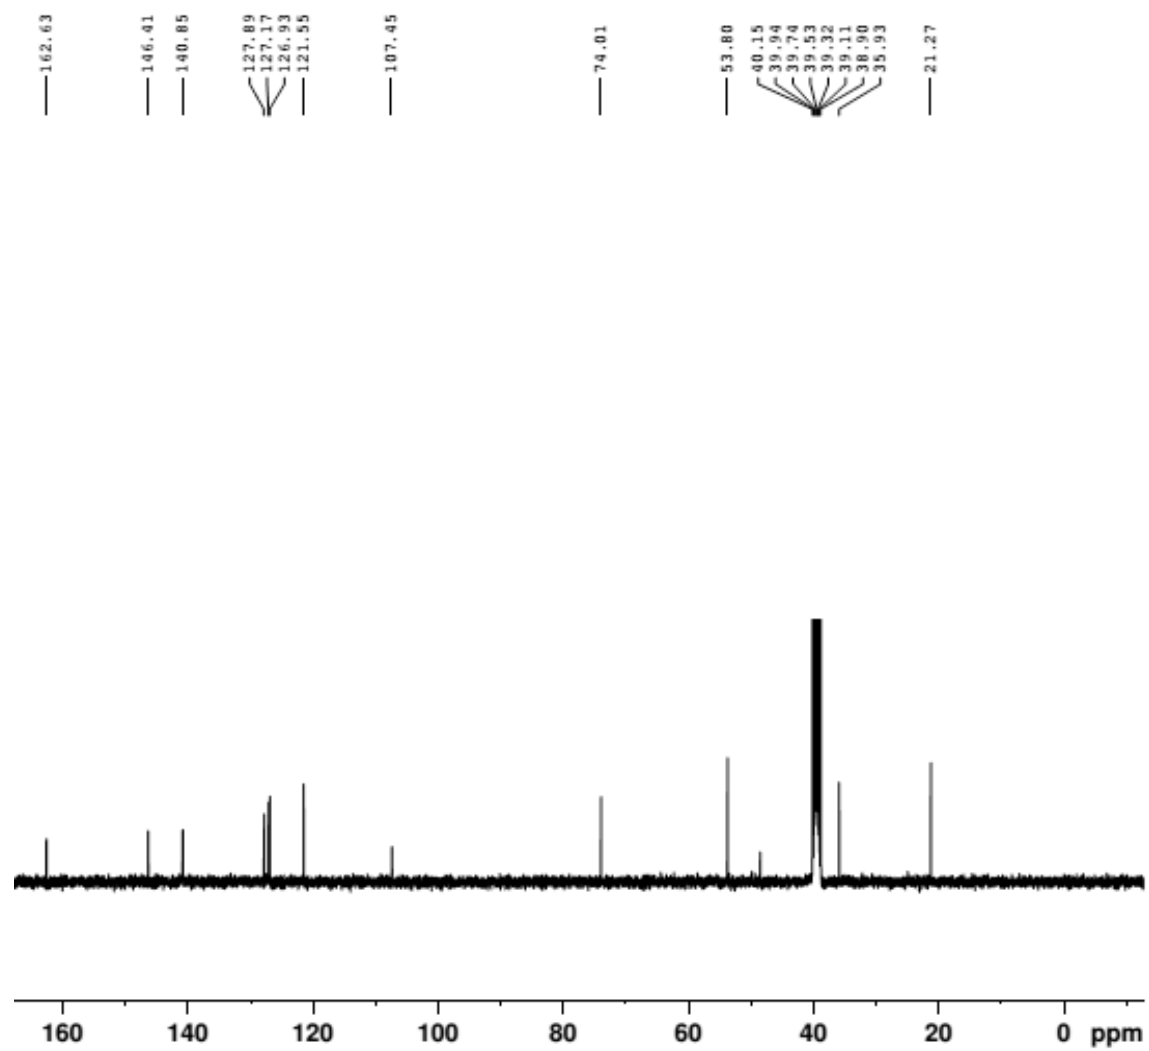

$^{13}\text{C}$  NMR (100 MHz) in  $\text{DMSO-}d_6$

### Compound 7

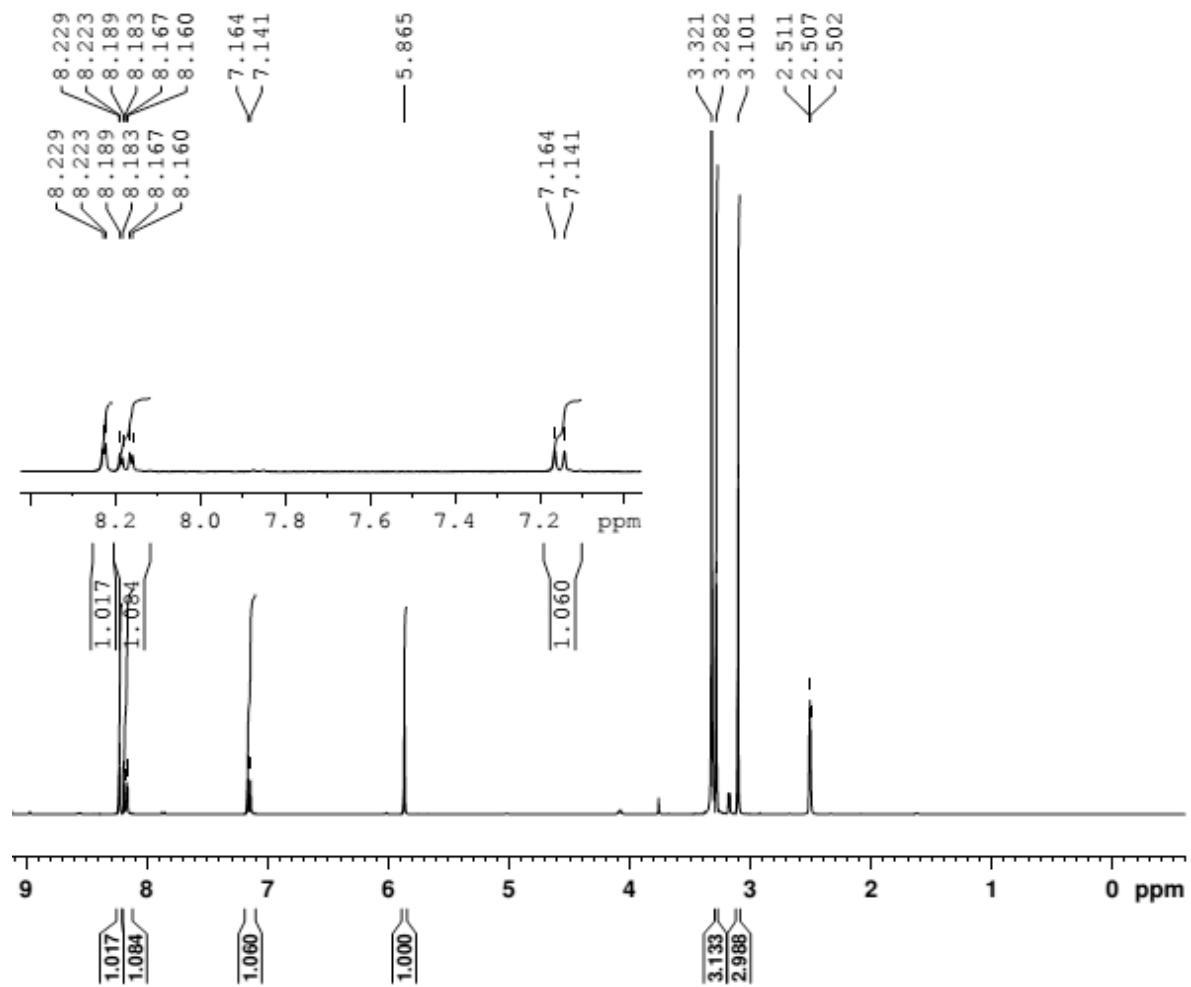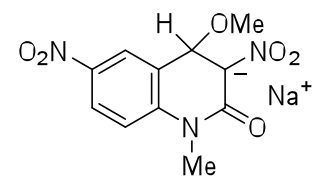

<sup>1</sup>H NMR (400 MHz) in DMSO-*d*<sub>6</sub>



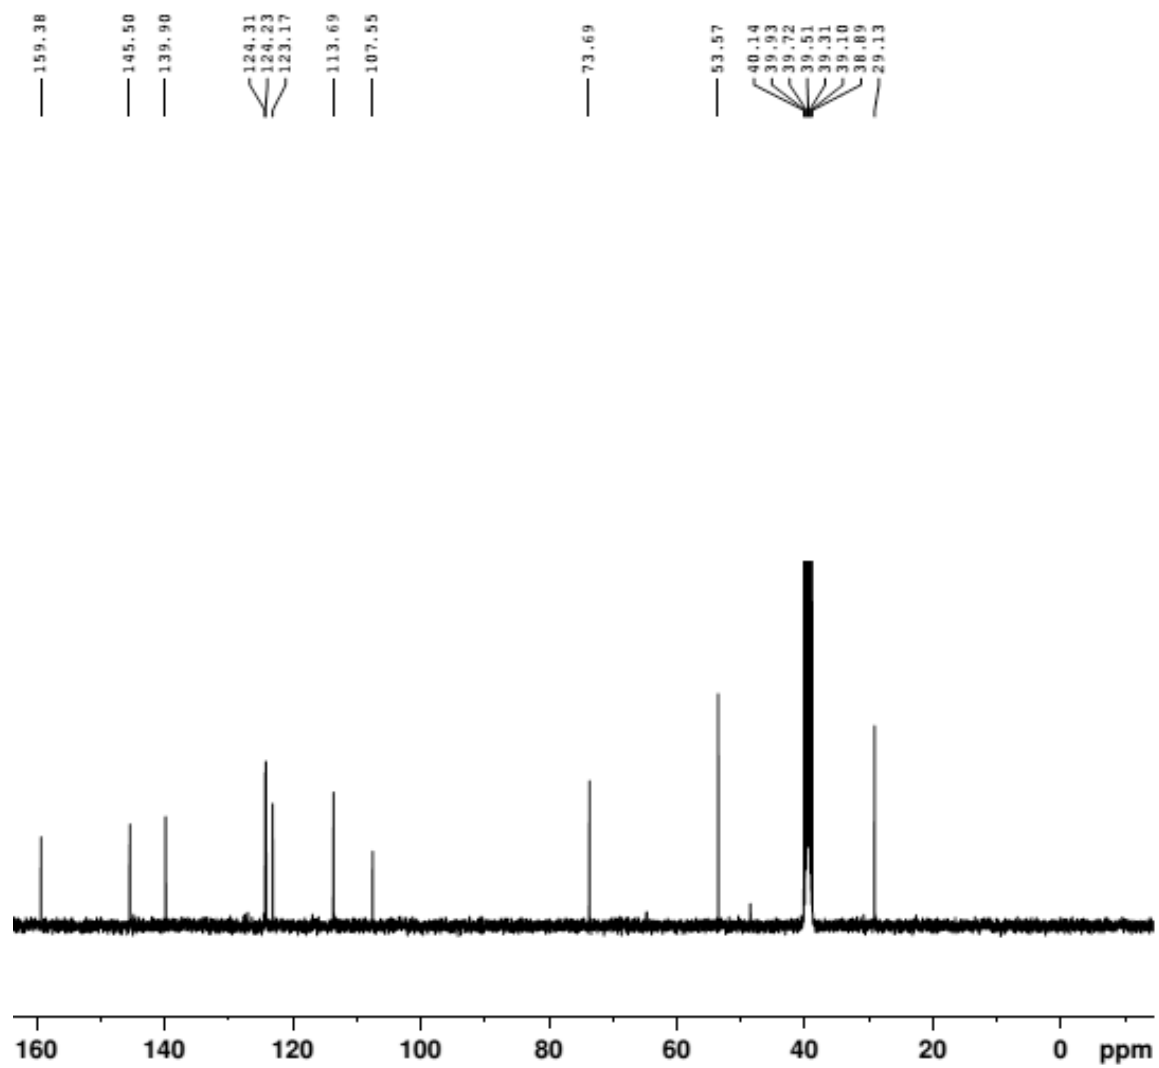

$^{13}\text{C}$  NMR (100 MHz) in  $\text{DMSO-}d_6$

### Compound 8

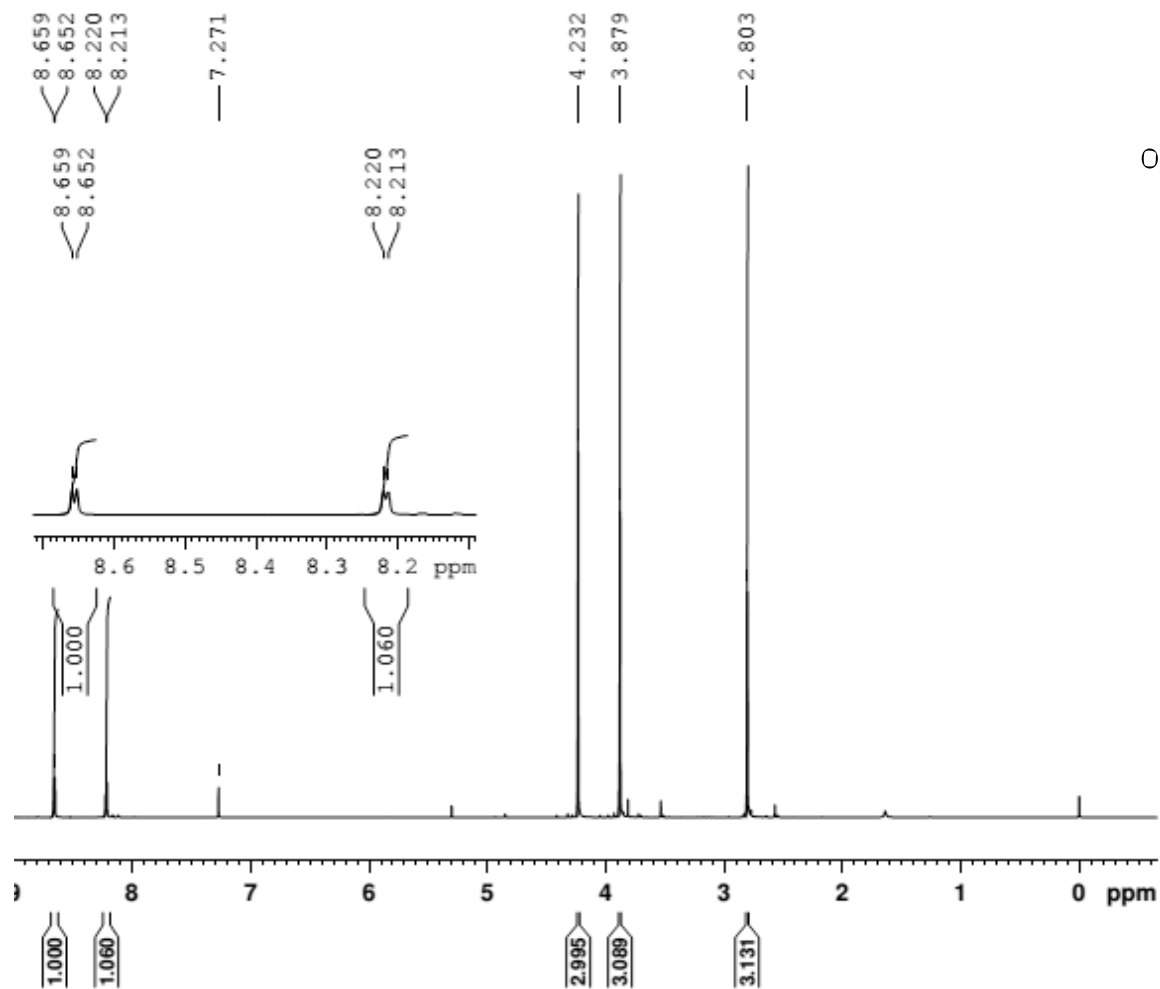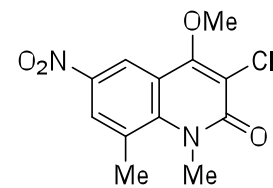

<sup>1</sup>H NMR (400 MHz) in CDCl<sub>3</sub>

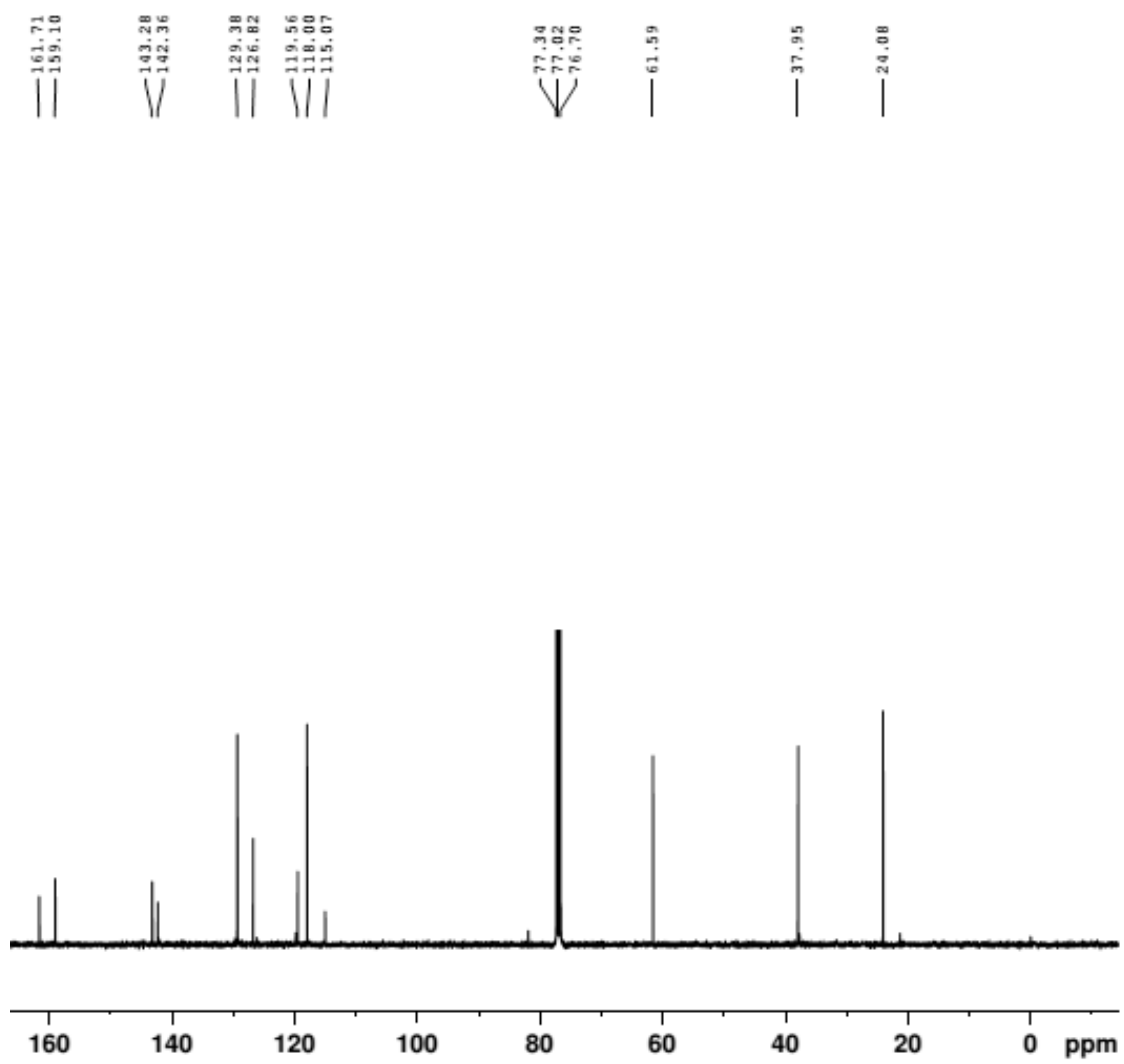

$^{13}\text{C}$  NMR (100 MHz) in  $\text{CDCl}_3$

### Compound 9

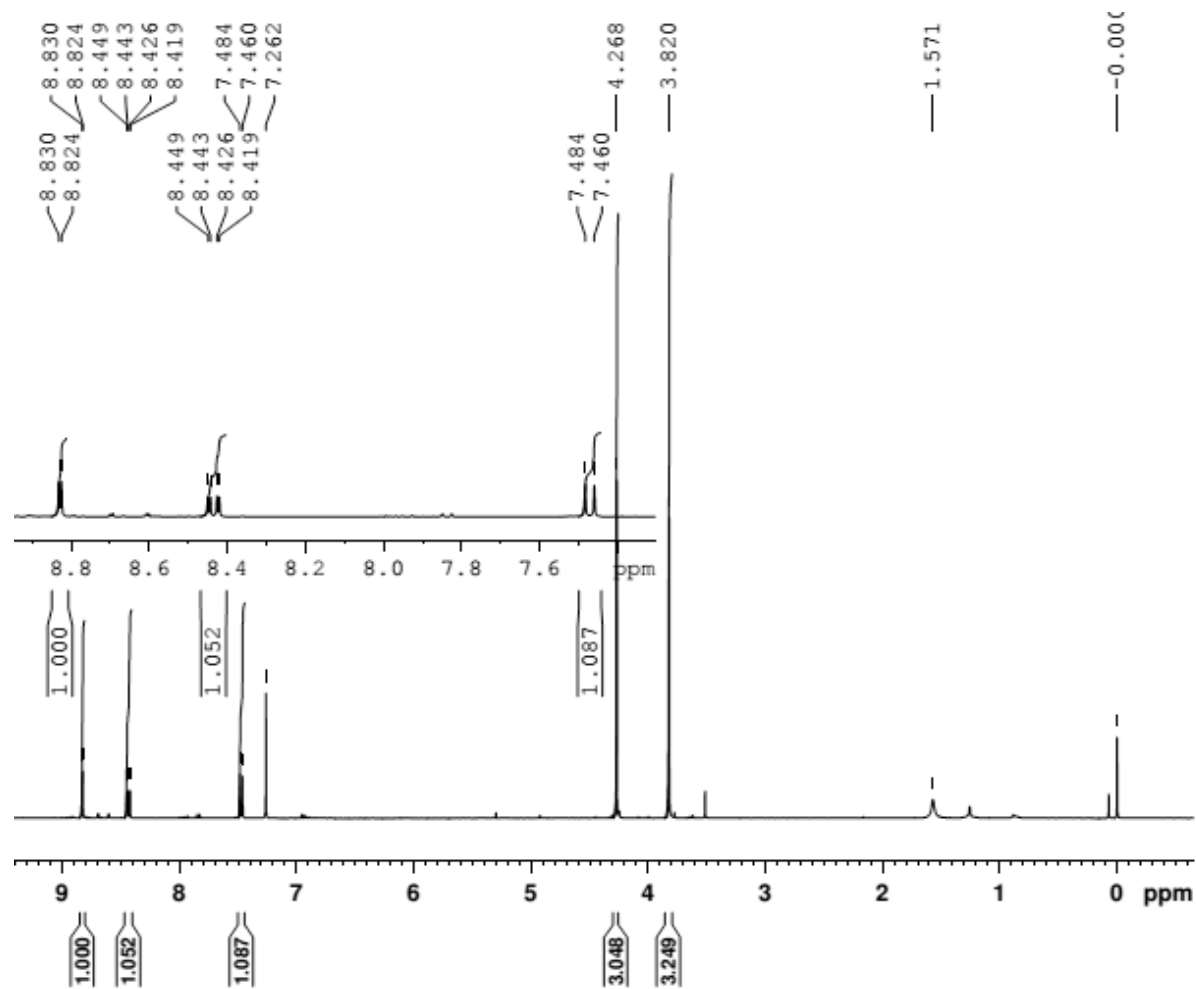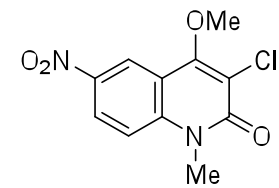

<sup>1</sup>H NMR (400 MHz) in CDCl<sub>3</sub>

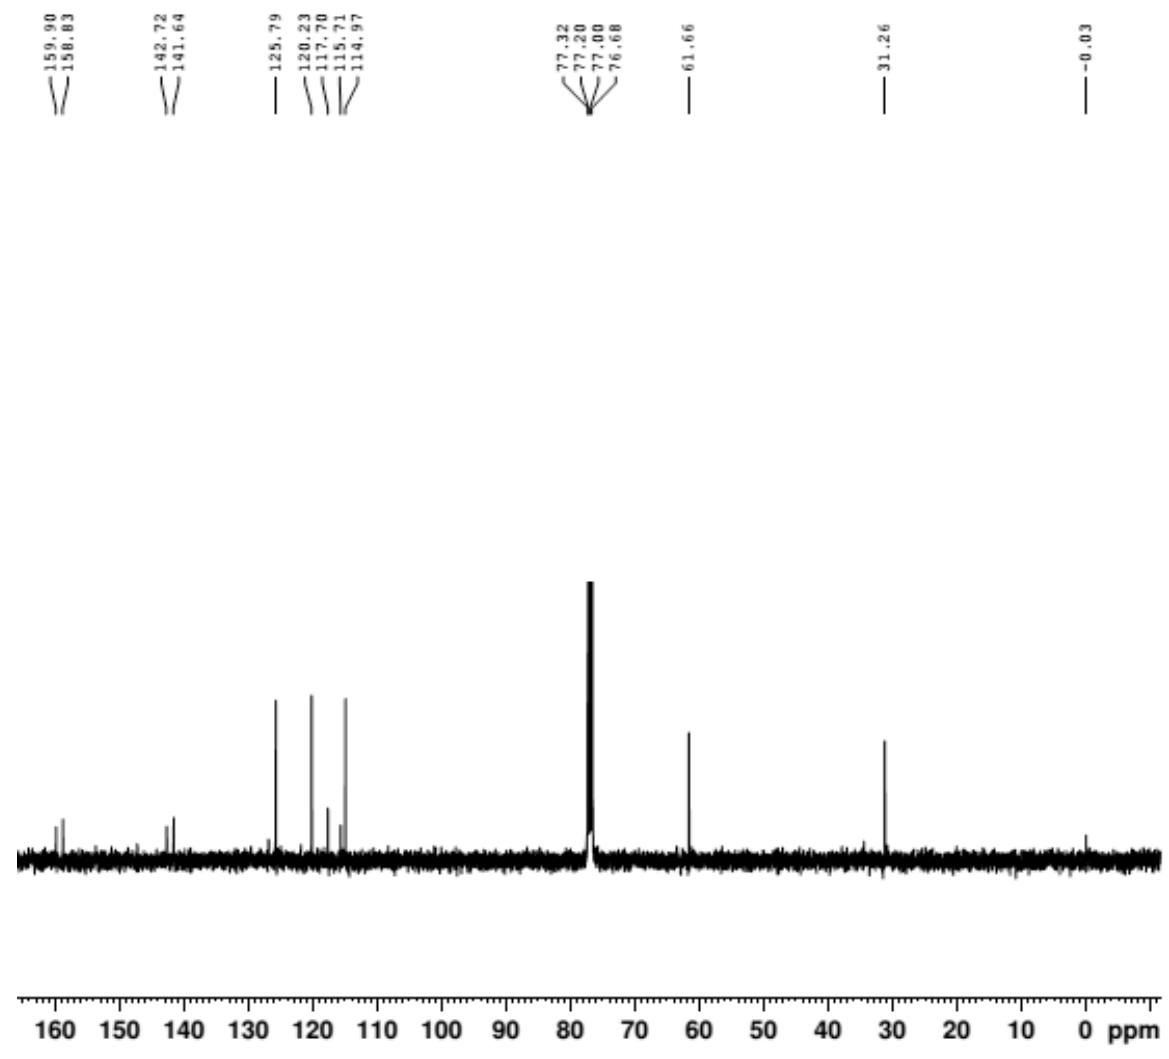

$^{13}\text{C}$  NMR (100 MHz) in  $\text{CDCl}_3$

### Compound 11

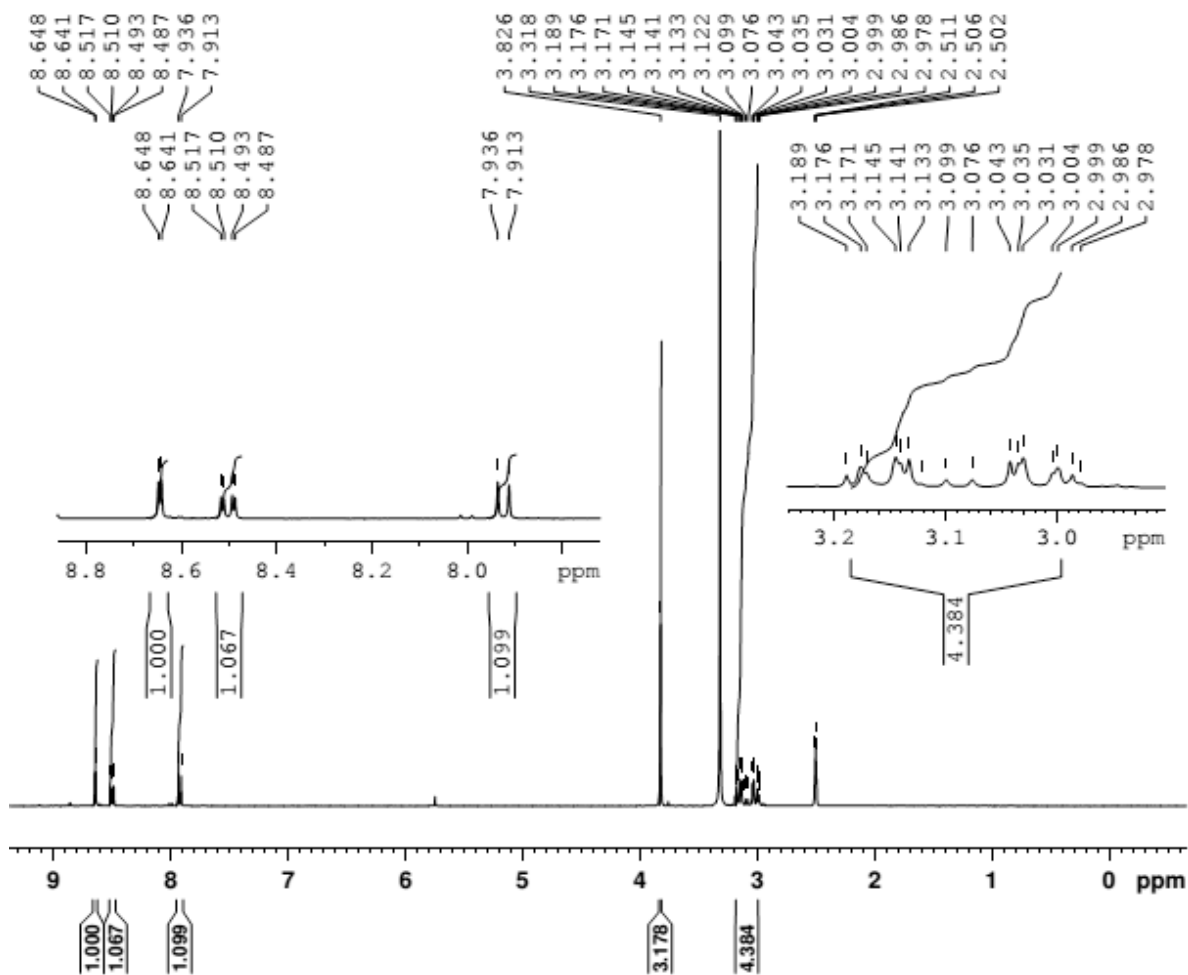

<sup>1</sup>H NMR (400 MHz) in DMSO-*d*<sub>6</sub>

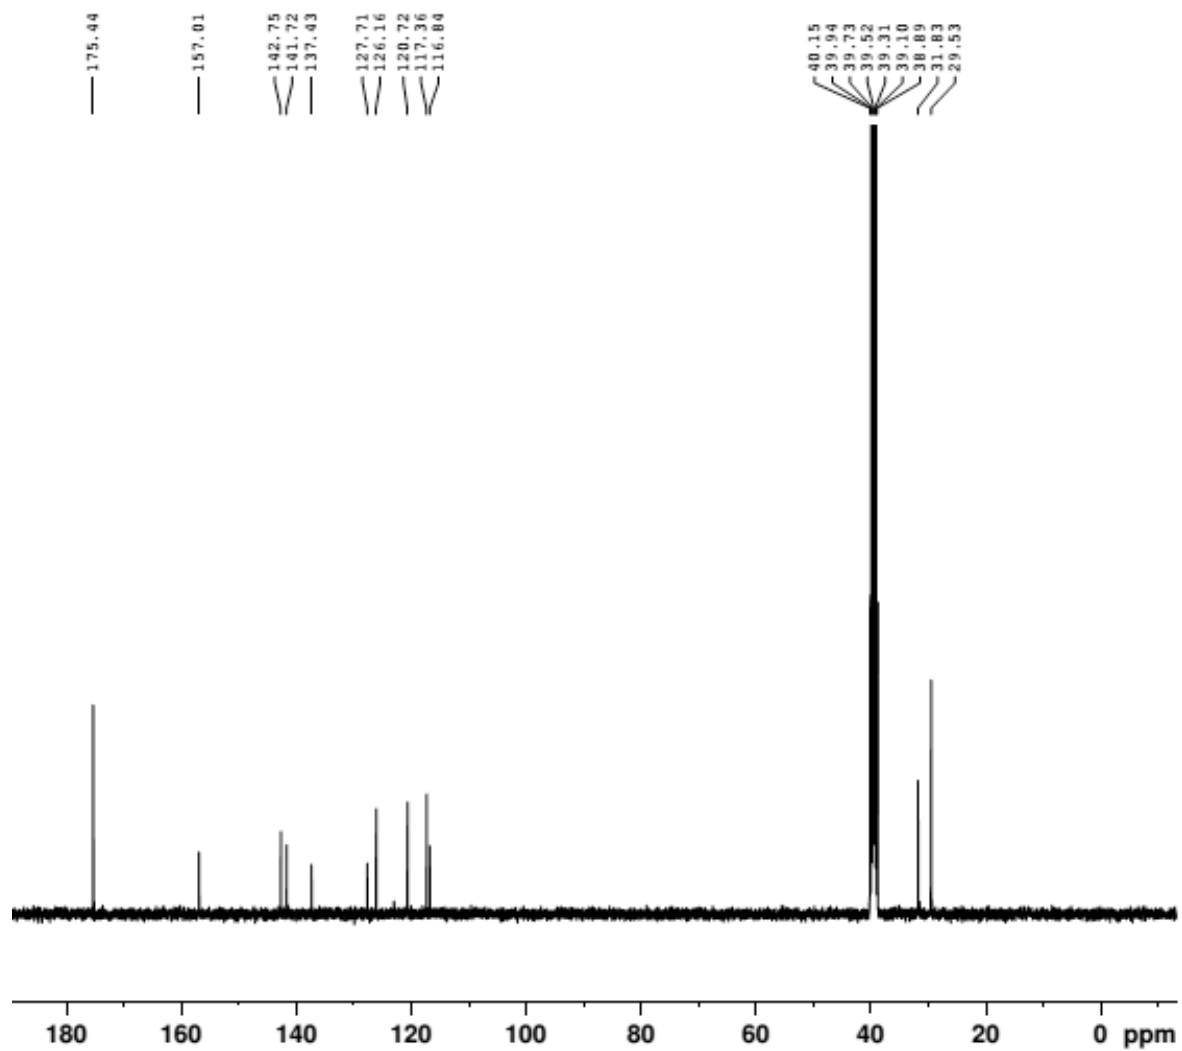

$^{13}\text{C}$  NMR (100 MHz) in  $\text{DMSO-}d_6$

### Compound 13

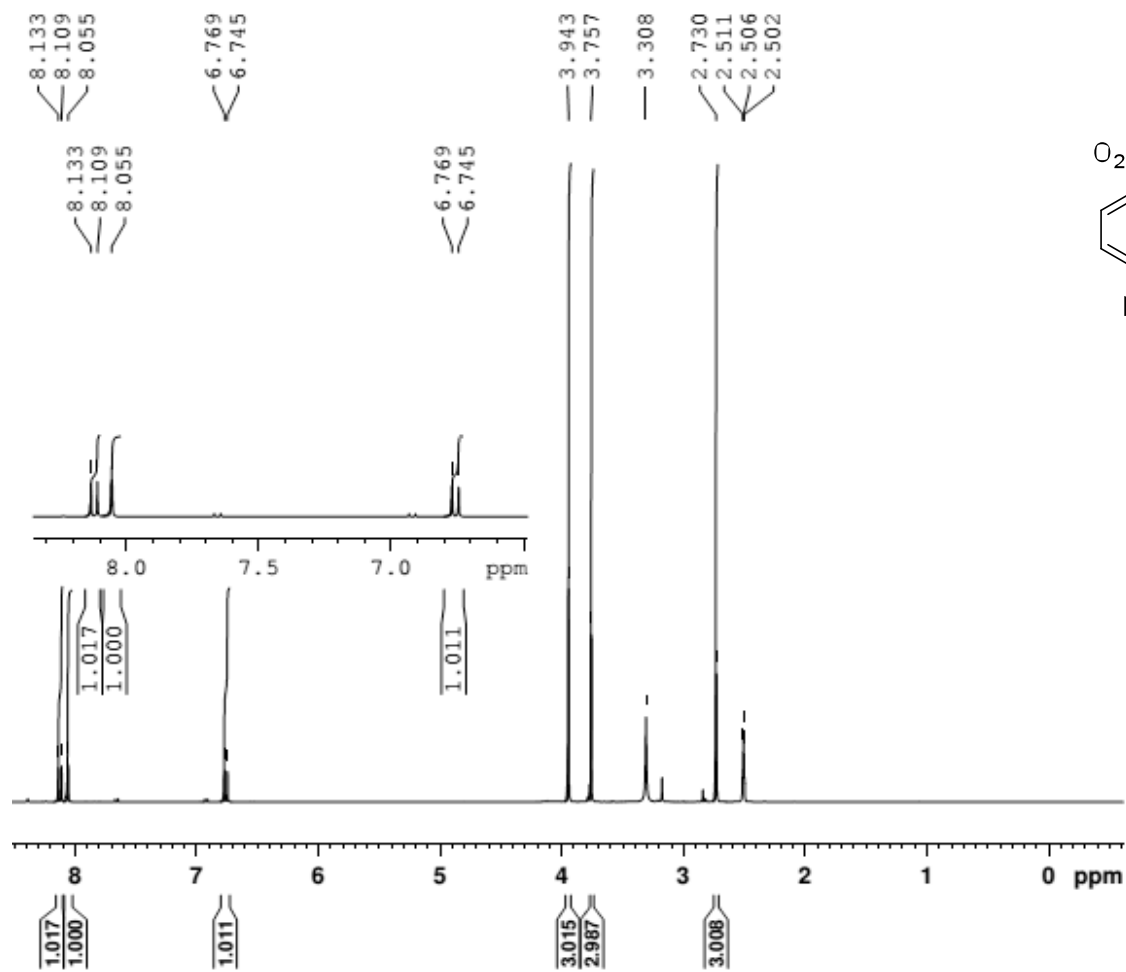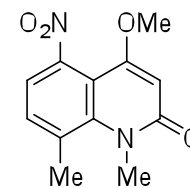

<sup>1</sup>H NMR (400 MHz) in DMSO-*d*<sub>6</sub>



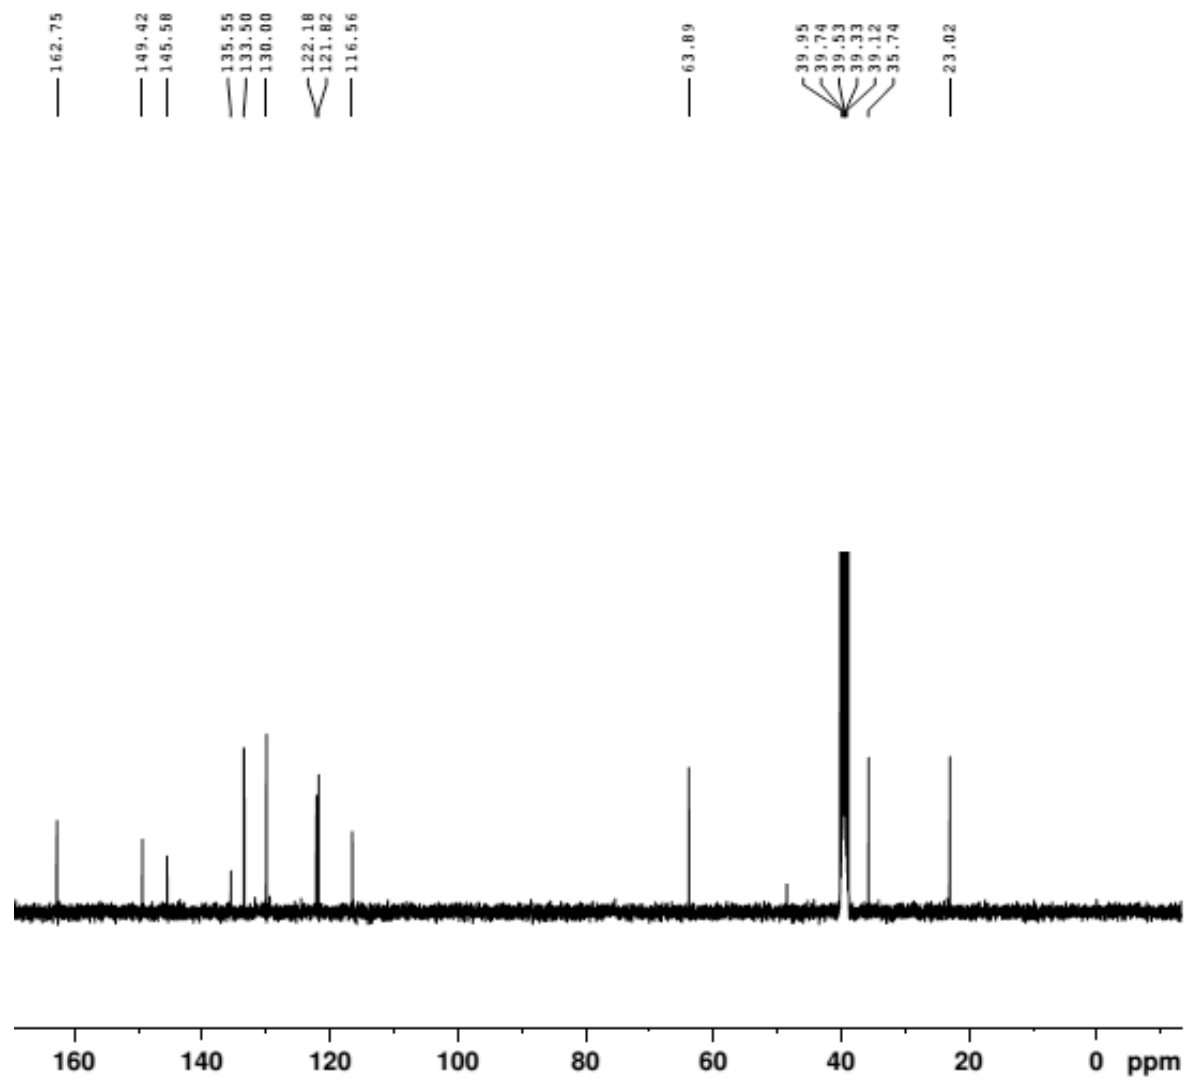

$^{13}\text{C}$  NMR (100 MHz) in  $\text{DMSO-}d_6$

### Compound 15

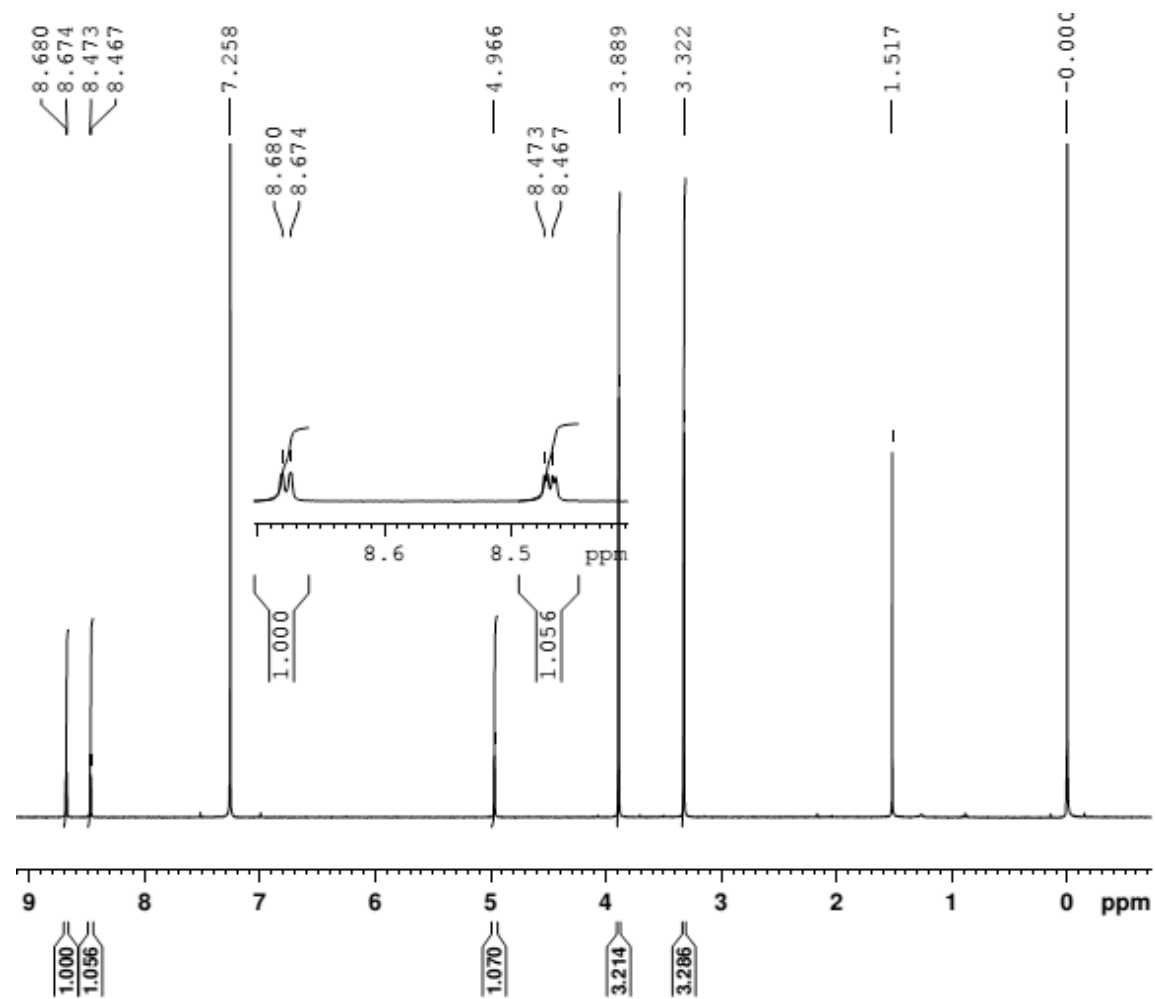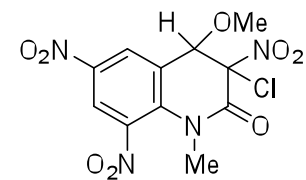

<sup>1</sup>H NMR (400 MHz) in CDCl<sub>3</sub>

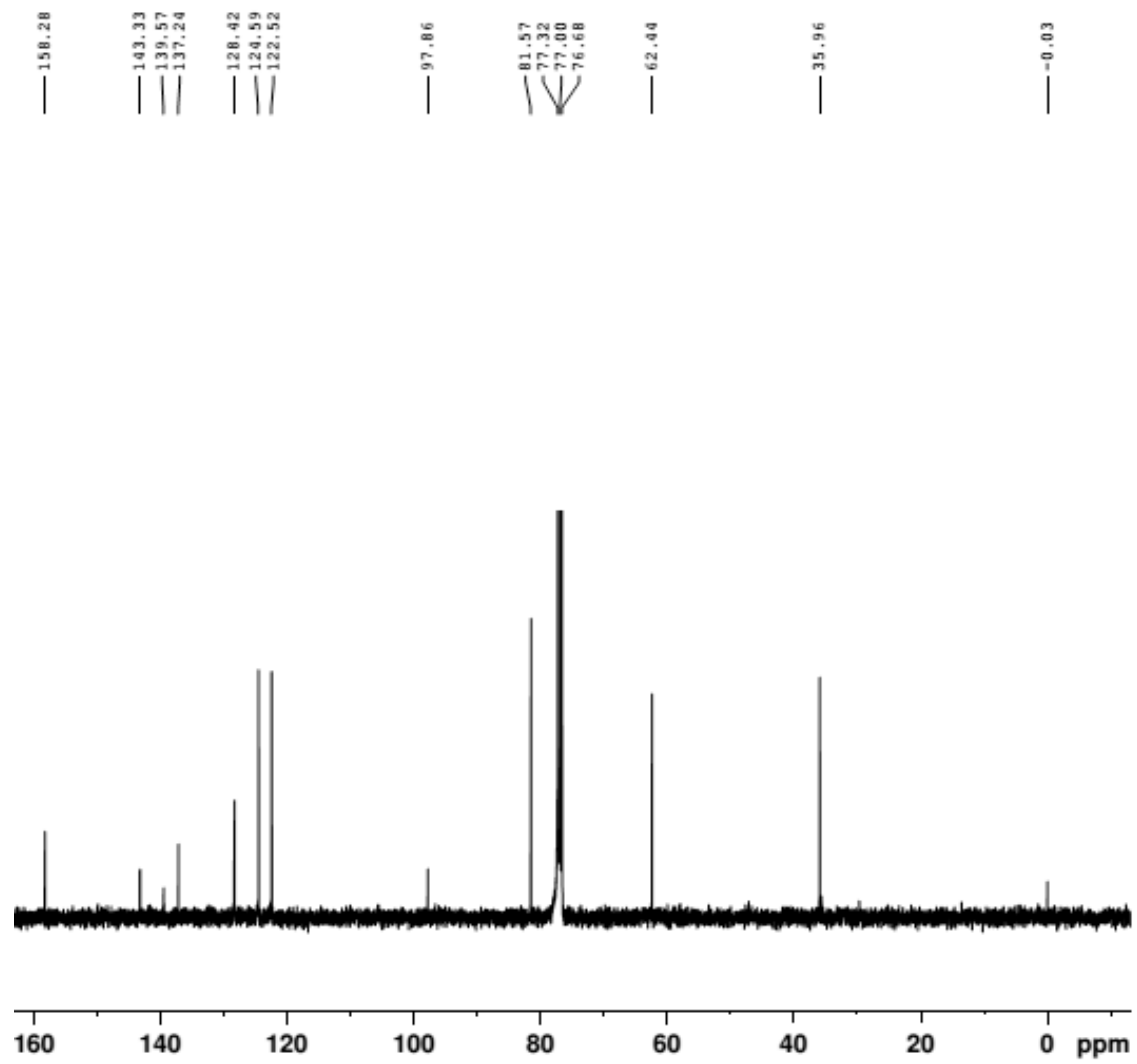

$^{13}\text{C}$  NMR (100 MHz) in  $\text{CDCl}_3$

NH<sub>2</sub>-Cl-DNQ

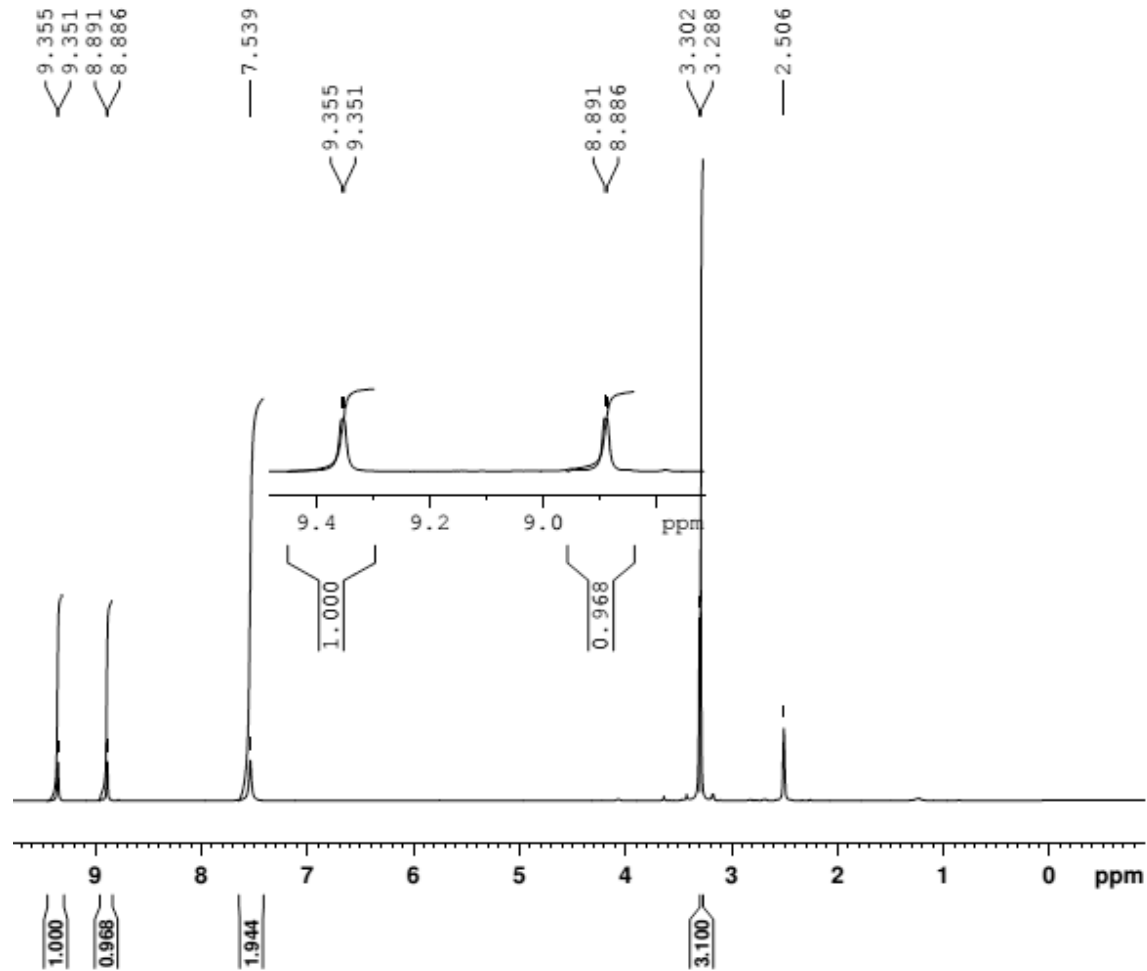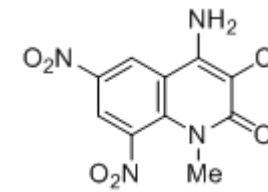

<sup>1</sup>H NMR (400 MHz) in DMSO-*d*<sub>6</sub>

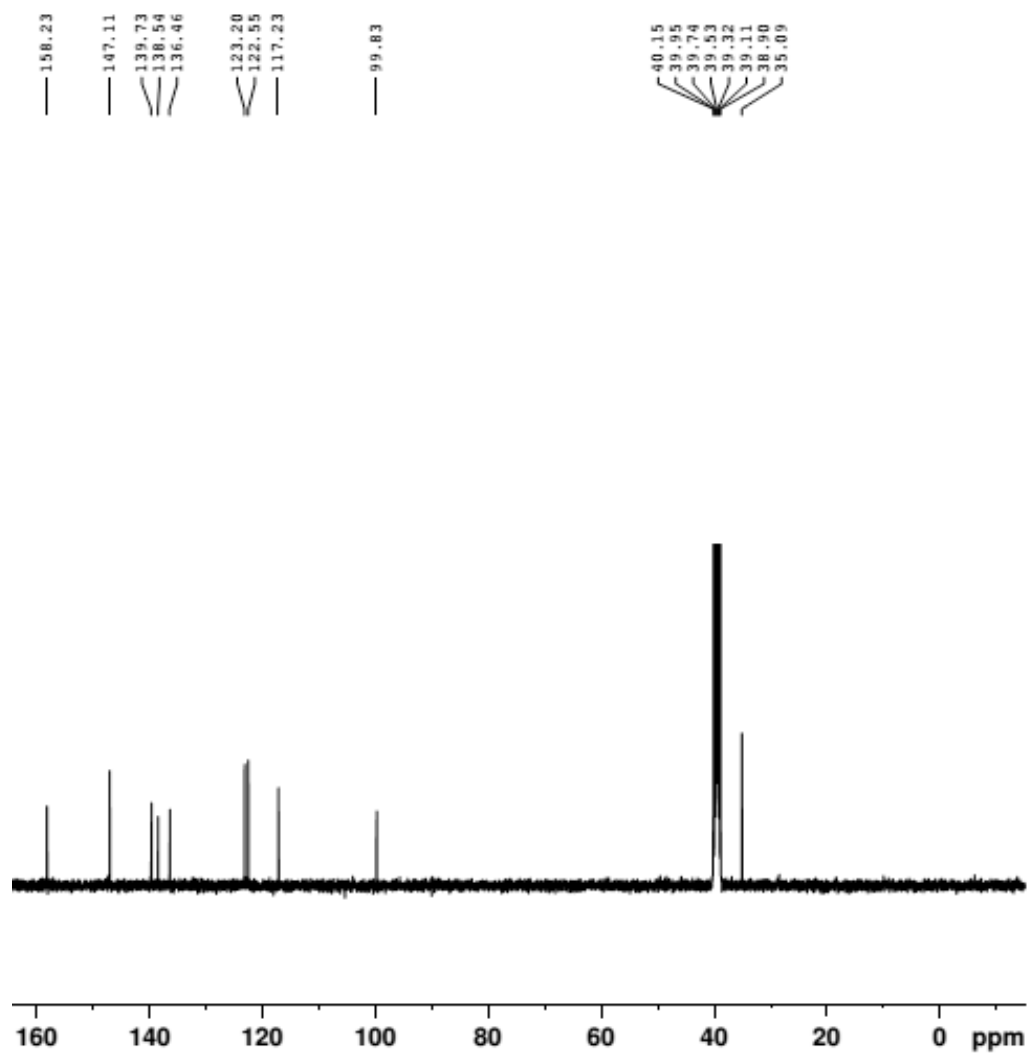

<sup>13</sup>C NMR (100 MHz) in DMSO-*d*<sub>6</sub>

### Compound 16

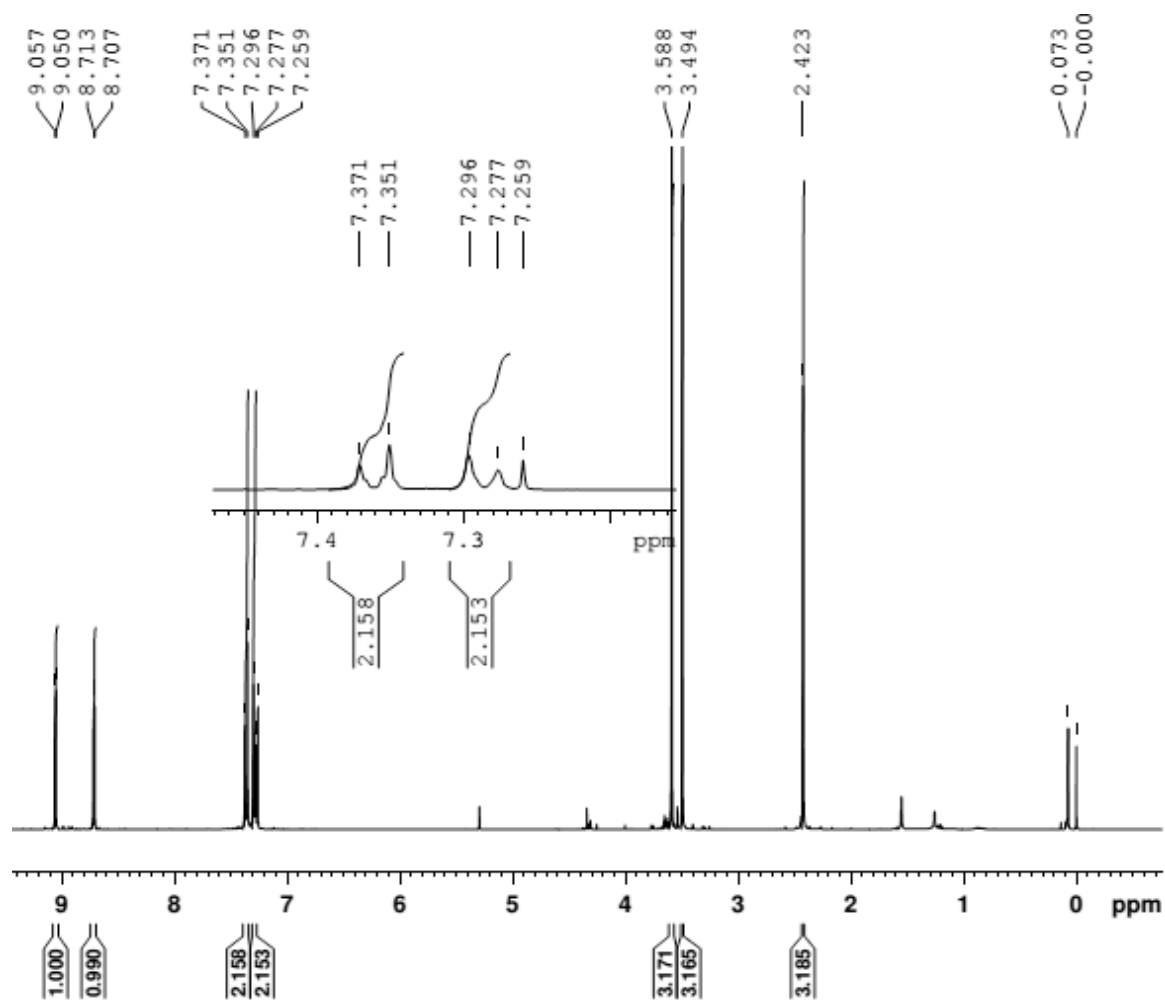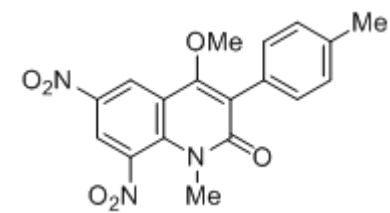

$^1\text{H}$  NMR (400 MHz) in  $\text{CDCl}_3$

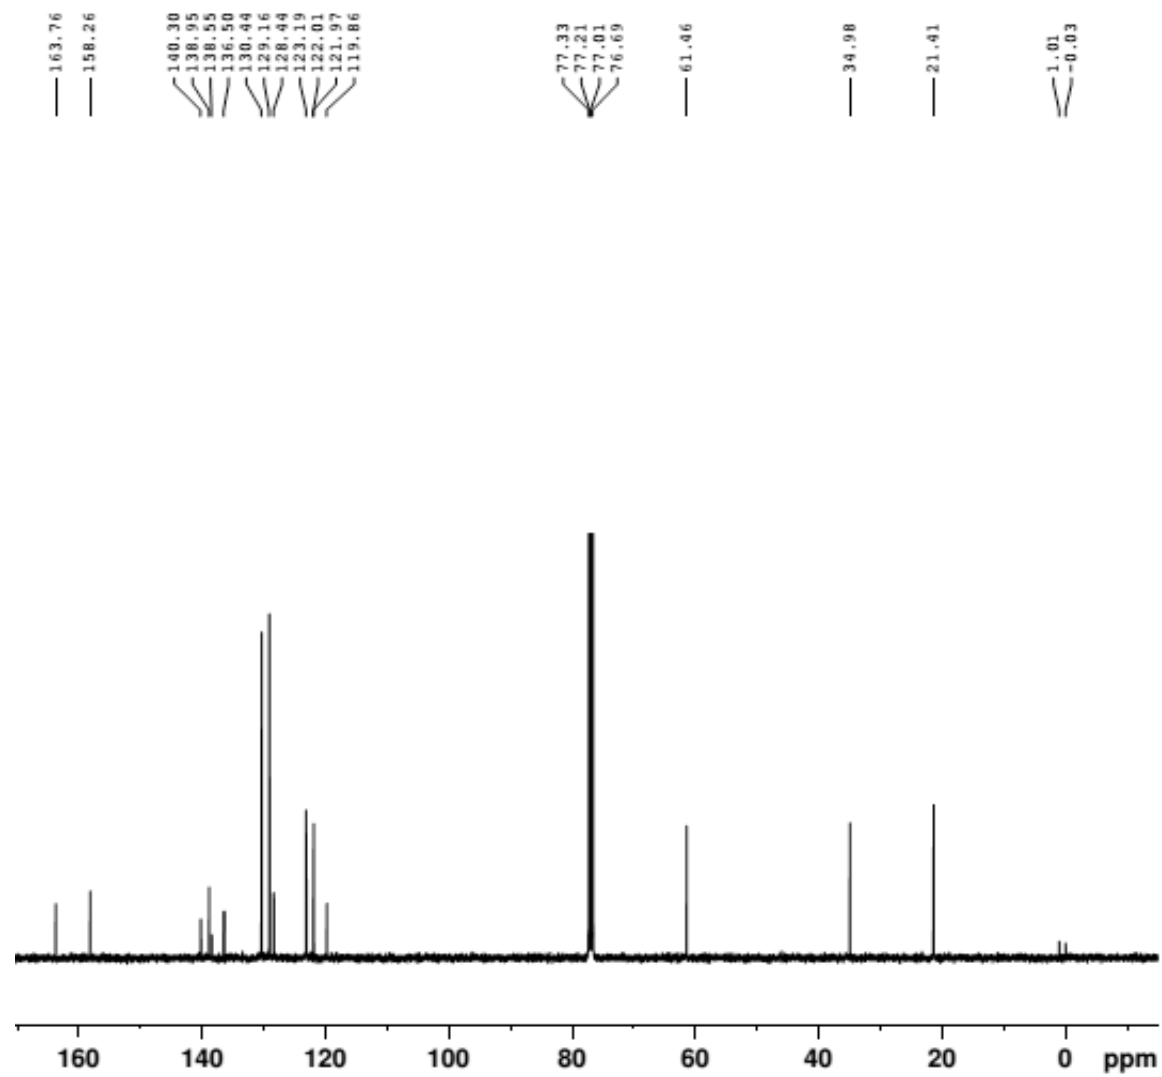

<sup>13</sup>C NMR (100 MHz) in CDCl<sub>3</sub>
